# Supplementary material for: Acute coronary syndromes presentations and care outcomes in white, South Asian and Chinese patients: a cohort study
Source: PubMed Central journal article supplement — BMJ Open. 2019 Mar 13;9(3):e022479. doi: 10.1136/bmjopen-2018-022479 (PMC6429729; doi:10.1136/bmjopen-2018-022479), 2019-03-13
Supplement: bmjopen-2018-022479.draft_revisions.pdf [file bmjopen-2018-022479.draft_revisions.pdf]

# BMJ Open

BMJ Open is committed to open peer review. As part of this commitment we make the peer review history of every article we publish publicly available.

When an article is published we post the peer reviewers' comments and the authors' responses online. We also post the versions of the paper that were used during peer review. These are the versions that the peer review comments apply to.

The versions of the paper that follow are the versions that were submitted during the peer review process. They are not the versions of record or the final published versions. They should not be cited or distributed as the published version of this manuscript.

BMJ Open is an open access journal and the full, final, typeset and author-corrected version of record of the manuscript is available on our site with no access controls, subscription charges or pay-per-view fees (<http://bmjopen.bmj.com>).

If you have any questions on BMJ Open's open peer review process please email [info.bmjopen@bmj.com](mailto:info.bmjopen@bmj.com)

# BMJ Open

## ACUTE CORONARY SYNDROMES PRESENTATIONS AND CARE ACCESS IN WHITE, SOUTH ASIAN, AND CHINESE PATIENTS: A COHORT STUDY

|                               |                                                                                                                                                                                                                                                                                                                                                                                                                                                                                                                                                   |
|-------------------------------|---------------------------------------------------------------------------------------------------------------------------------------------------------------------------------------------------------------------------------------------------------------------------------------------------------------------------------------------------------------------------------------------------------------------------------------------------------------------------------------------------------------------------------------------------|
| Journal:                      | <i>BMJ Open</i>                                                                                                                                                                                                                                                                                                                                                                                                                                                                                                                                   |
| Manuscript ID                 | bmjopen-2018-022479                                                                                                                                                                                                                                                                                                                                                                                                                                                                                                                               |
| Article Type:                 | Research                                                                                                                                                                                                                                                                                                                                                                                                                                                                                                                                          |
| Date Submitted by the Author: | 23-Feb-2018                                                                                                                                                                                                                                                                                                                                                                                                                                                                                                                                       |
| Complete List of Authors:     | King-Shier, Kathryn; University of Calgary, Nursing<br>Quan, Hude; University of Calgary, Community Health Sciences<br>Kapral, MK; University of Toronto, Department of Medicine, Division of General Internal Medicine<br>Tsuyuki, Ross; University of Alberta, Faculty of Medicine and Dentistry<br>An, Libin; Dalian University, School of Nursing<br>Banerjee, Suvro; Apollo Gleneagles Hospital, Cardiology<br>Southern, Danielle; University of Calgary, Community Health Sciences<br>Khan, Nadia; University of British Columbia, Medicine |
| Keywords:                     | ethnicity, acute coronary syndrome, symptoms, care access                                                                                                                                                                                                                                                                                                                                                                                                                                                                                         |
|                               |                                                                                                                                                                                                                                                                                                                                                                                                                                                                                                                                                   |

SCHOLARONE™  
Manuscripts

1  
2  
3 **ACUTE CORONARY SYNDROMES PRESENTATIONS AND CARE ACCESS IN**  
4 **WHITE, SOUTH ASIAN, AND CHINESE PATIENTS: A COHORT STUDY**  
5  
6

7 Kathryn M. King-Shier, RN, PhD<sup>1,2</sup>

8  
9 Hude Quan, MD, PhD<sup>2</sup>

10  
11 Moira Kapral, MD, MSc<sup>3</sup>

12  
13 Ross Tsuyuki, PharmD, MSc<sup>4</sup>

14  
15 Libin An, MD, PhD<sup>5</sup>

16  
17 Suvro Banerjee, MD<sup>6</sup>

18  
19 Danielle A. Southern, MSc<sup>2</sup>

20  
21 Nadia Khan, MD, MSc<sup>7</sup>  
22  
23

24  
25  
26 <sup>1</sup> Faculty of Nursing, University of Calgary, Calgary, Alberta, Canada

27 <sup>2</sup> Department of Community Health Sciences, Cumming School of Medicine, University of  
28 Calgary, Calgary, Alberta, Canada

29 <sup>3</sup> Department of Medicine, Division of General Internal Medicine, University of Toronto,  
30 Toronto, Canada.

31 <sup>4</sup> Division of Cardiology, Faculty of Medicine and Dentistry, University of Alberta, Edmonton,  
32 Alberta, Canada

33 <sup>5</sup> School of Nursing, Dalian University, Dalian, China

34 <sup>6</sup> Apollo Gleneagles Hospital, Kolkata, India

35 <sup>7</sup> Department of Medicine, Faculty of Medicine, Center for Health Evaluation and Outcomes  
36 Sciences, University of British Columbia, Vancouver, British Columbia, Canada  
37  
38

39  
40 **CORRESPONDING AUTHOR:**

41 Kathryn M. King-Shier  
42 Faculty of Nursing, University of Calgary  
43 2500 University Drive NW  
44 Calgary, Alberta, Canada T2N 1N4  
45 403-220-4643 (telephone)  
46 403-210-8601 (fax)  
47 kingk@ucalgary.ca  
48  
49

50 **WORD COUNT: 2600**  
51  
52  
53  
54  
55  
56  
57  
58  
59  
60

## ABSTRACT

**Objectives.** Successful treatment of acute coronary syndrome (ACS) relies on its rapid recognition. It is unclear whether the accepted presentation of chest pain applies to different ethnic groups. We aimed to examine potential ethnic variations in ACS symptoms in white, south Asian, and Chinese patients.

**Design.** Cross sectional survey.

**Setting.** Participants had been hospitalized at one of 12 Canadian centres across 4 provinces.

**Participants.** 1334 ACS patients (630 white; 488 south Asian; 216 Chinese).

**Main outcome measures.** ACS presentation symptoms (including classic/typical mid-sternal pain/discomfort or mid-sternal pain/discomfort with radiation to the left neck, shoulder or arm) were assessed by self-report. Clinical outcomes (time to emergency room (ER) presentation, cardiac catheterization; receipt of cardiac catheterization, percutaneous coronary intervention (PCI) or coronary artery bypass grafting (CABG)) were obtained by health record audit.

**Results.** The mean age of the sample was 62 years and 30% had STEMI. A substantial proportion of patients reported atypical symptoms (33% white, 19% south Asian, 20% Chinese;  $p < 0.006$ ). Yet, the most common presenting symptom was mid-sternal pain/discomfort of any intensity regardless of ethnic status. After adjustment for age, sex, education, current smoking, presence of diabetes or chronic kidney disease, STEMI vs non-STEMI/unstable angina, and education, south Asians were more likely to present with at least moderate intensity mid-sternal pain/discomfort (Adjusted Odds Ratio (AOR) 1.44; 95% Confidence Interval (CI) 1.05-1.98) whereas Chinese were less likely to present with radiating symptoms (AOR 0.53; 95% CI 0.38-0.74) compared with whites. South Asians with atypical pain (relative to those with mid-sternal

1  
2  
3 pain/discomfort) took significantly longer to present to the ER ( $p=0.037$ ), and were less likely to  
4  
5 receive PCI ( $p=0.008$ ) or CABG ( $p=0.041$ ).  
6

7  
8 **Conclusions.** Atypical presentations were associated with greater delays in arrival to the  
9  
10 emergency department and reduced invasive cardiovascular care in south Asians.  
11

## 12 13 14 **STRENGTHS AND LIMITATIONS OF THIS STUDY**

- 15  
16  
17 • This was a rigorously designed study which included participants who spoke a variety of  
18  
19 languages and used highly systematic and validated translation and data collection  
20  
21 processes.  
22
- 23  
24 • A number of mechanisms were used to obtain a data regarding participants' ACS  
25  
26 symptoms.  
27
- 28  
29 • Only participants who survived their ACS event were included in this study. It is not  
30  
31 possible to know if patients who succumbed to their ACS event or did not seek care had  
32  
33 different symptoms than those who were diagnosed and survived.  
34
- 35  
36 • There was a noteworthy proportion of south Asian and Chinese patients approached to  
37  
38 participate who refused.  
39  
40  
41  
42  
43  
44  
45  
46  
47  
48  
49  
50  
51  
52  
53  
54  
55  
56  
57  
58  
59  
60

## INTRODUCTION

The burden of acute coronary syndrome (ACS) is substantial is now the leading cause of death and disability world-wide.<sup>1,2</sup> Life-saving therapies for ACS are dependent on early and timely recognition of symptoms. Atypical presentation of ACS symptoms leads to delays in recognizing symptoms by both patients and healthcare providers, and can result in misdiagnosis, delayed treatment, receipt of fewer evidence-based therapies, and higher in-hospital morbidity and mortality.<sup>3</sup>

The 'classic' ACS presentation, based on the presentation of men of European descent, includes moderate to severe intensity central chest with or without left arm, neck or jaw radiating pain or discomfort.<sup>4,5</sup> This description has been adopted internationally, though some studies suggest that ACS symptoms may differ by ethnicity.<sup>6-11</sup> Although these studies yielded discordant findings, some noted that non-white patients may present with additional symptoms (e.g., gastro-intestinal, dyspnea, nausea)<sup>6-9,11</sup> and south Asians may have more diffuse pain and more frequent back pain<sup>10</sup> than whites. It is difficult to draw robust conclusions from the current evidence given variable methods of data collection, inadequate cross cultural language adaptation, small sample sizes, and insufficient adjustment for other factors (e.g., sex, age, clinical factors) that may influence ACS presentation.

South Asians have a higher incidence of ACS and earlier onset relative to other ethnic groups.<sup>13,14</sup> Though Chinese currently have a lower incidence of acute myocardial infarction (AMI) relative to whites and south Asians,<sup>15,16</sup> cardiovascular events in China are expected to rise by more than 50% by 2030.<sup>17</sup> A rigorous investigation of ACS symptom presentation, time to arrival to the emergency department and cardiovascular care between these ethnic groups is warranted to ensure appropriate public health messaging and/or inappropriate stereotyping of

1  
2  
3 presenting symptoms. We thus aimed to examine potential ethnic variations in ACS symptoms  
4  
5 using a rigorously cross-culturally adapted symptom questionnaire and visual identifiers in a  
6  
7 multi-centre cohort of white, south Asian, and Chinese patients hospitalized in Canada.  
8  
9

## 10 **METHODS**

### 11 **Study design**

12  
13  
14 We conducted a cross-sectional survey of a cohort of white (i.e., of European descent),  
15  
16 south Asian (i.e., descended from India, Pakistan, Bangladesh, Sri Lanka), and Chinese (i.e.,  
17  
18 descended from China, Hong Kong, Taiwan, Macau) patients hospitalized with physician-  
19  
20 confirmed ACS (unstable angina, ST-elevation (STEMI) or non-ST-elevation (non-STEMI)  
21  
22 myocardial infarction<sup>5</sup>).  
23  
24  
25

### 26 **Setting and sample**

27  
28 Following institutional ethics review at each participating hospital, participants were  
29  
30 recruited consecutively from 12 urban hospitals in 4 Canadian provinces (>90% of Canada's  
31  
32 immigrants reside in urban areas and the majority reside in these provinces<sup>12</sup>) between  
33  
34 September 2010 and December 2015. Inclusion criteria were age  $\geq 19$  years; admission to  
35  
36 hospital with a confirmed diagnosis of ACS (as identified on health record); self-reported  
37  
38 ethnicity for either white (European), south Asian, or Chinese; and speaking English, Punjabi,  
39  
40 Tamil, Urdu, Hindi, or Gujarati, (among the most common languages of Canadian residents from  
41  
42 south Asia),<sup>12</sup> Cantonese, or Mandarin. Nearly 95% of south Asians and all Chinese residing in  
43  
44 Canada would have been able to speak one or more of the languages used in this study.<sup>12</sup>  
45  
46  
47  
48 Exclusion criteria were multiple ethnic origins (i.e., mixed-race) or known cognitive deficits (i.e.,  
49  
50 Alzheimer's Disease, dementia, uncontrolled psychiatric disorder), as identified on the health  
51  
52 record. All participants provided informed consent to participate in this study.  
53  
54  
55  
56  
57  
58  
59  
60

## Patient and Public Involvement

Patients were not involved in the conception, design or interpretation of this study. However, we have a detailed plan to disseminate this information widely to healthcare providers as well as potential patients, through traditional and social media.

## Data collection

Data were collected while participants were in hospital (within the first 5 days), in the patient's preferred language (as listed above) by highly trained like-speaking research assistants. As reported elsewhere,<sup>18</sup> rigorous translation processes were undertaken for study materials.

Questionnaires were developed based on the current literature, and our earlier work.<sup>10,19-21</sup> We, like Teoh et al.,<sup>10</sup> asked participants to mark, on a gender-neutral torso silhouette (pictograph), all the locations of the pain/discomfort that brought them to hospital. Each participant used the same type of pen to 'colour in' the areas. Then, the participant was prompted to identify if he/she experienced other symptoms such as nausea, diaphoresis, dyspnea, dizziness or weakness. Next, they were asked to identify their 'chief' or 'main' symptom, describe its nature by pointing to pictorial identifiers (i.e., stabbing, heavy, shooting, burning, squeezing),<sup>9,21</sup> and finally identify its intensity (Likert-type scale, 0-10 where 0 was no pain). Pain/discomfort severity rated as  $< 5$  was considered mild and  $\geq 5$  or higher was considered moderate to severe pain.

A health record audit was undertaken to collect additional demographic and as well as clinical data, once the participant had been discharged from hospital.

The outcomes of interest were symptom location and severity; time to emergency room (ER) presentation and cardiac catheterization; as well as receipt of cardiac catheterization, percutaneous coronary intervention (PCI) or coronary artery bypass graft surgery (CABG). The



1  
2  
3 presence or absence of classic (typical) ACS presentation was defined as having mid-sternal or  
4 having mid-sternal with radiating left neck, shoulder or arm pain/discomfort of any or at least  
5 moderate intensity.  
6  
7  
8

### 9 10 **Statistical analysis**

11  
12 Descriptive statistics and Chi-Square tests were used to identify differences in participant  
13 characteristics, as well as symptoms and location(s) of pain/discomfort between ethnic groups.  
14 To analyze presenting symptoms data, a grid was placed over the original torso silhouette to  
15 identify the location(s) of pain/discomfort in a standardized manner.<sup>10</sup> These data were also  
16 presented as proportions of each participant group who identified any pain/discomfort in the  
17 various areas as well as moderate to severe pain/discomfort rated as  $\geq 5/10$  on a Likert-type  
18 scale. Crude and adjusted odds ratios with 95% confidence intervals were examined using  
19 logistic regression for south Asians and Chinese relative to whites having any mid-sternal  
20 pain/discomfort or any mid-sternal with radiating left neck, shoulder or arm pain/discomfort; as  
21 well as moderate to severe ( $\geq 5/10$ ) mid-sternal pain/discomfort or mid-sternal with radiating left  
22 neck, shoulder or arm pain/discomfort. Finally, crude and adjusted (as above) odds ratios with  
23 95% confidence intervals were examined to determine the likelihood of receiving cardiac  
24 catheterization, PCI, and CABG for each ethnic group, based on having any mid-sternal  
25 pain/discomfort or any mid-sternal with radiating left neck, shoulder or arm pain/discomfort.  
26  
27  
28  
29  
30  
31  
32  
33  
34  
35  
36  
37  
38  
39  
40  
41  
42  
43

44 Models were adjusted for demographic and clinical characteristics associated with  
45 atypical symptoms (age, sex, education, current smoker, presence of diabetes or chronic kidney  
46 disease (CKD), STEMI vs non-STEMI/unstable angina, and level of education). All data were  
47 analyzed using SAS version 9.4.  
48  
49  
50  
51  
52

### 53 54 **Pictographic analysis**

We used a heat-mapping technology to portray where participants identified that they pain/discomfort on the torso silhouettes.<sup>10</sup> Given that the numbers of participants varied by ethnic group, the mapping was based on proportion of participants who coloured areas on the torsos versus the absolute number.

## RESULTS

Of 3243 persons screened for eligibility, 1042 did not meet eligibility criteria, and 903 patients declined enrolment in the study. Of the final 1334 patients (58.8% men), 47.2% were white; 36.6% were south Asian and 16.2% were Chinese (see Table 1).

**Table 1.** Patient characteristics by ethnicity

|                         | white<br>(n=630) | south Asian<br>(n=488) | Chinese<br>(n=216) | p-value |
|-------------------------|------------------|------------------------|--------------------|---------|
| Age, mean (SD), years   | 65.9 (13.0)      | 62.2 (12.5)            | 65.1 (12.6)        | <0.0001 |
| Male                    | 276 (43.8%)      | 355 (72.8%)            | 154 (71.3%)        | <0.0001 |
| English Language Survey | 630 (100%)       | 440 (90.2%)            | 161 (74.5%)        | <0.0001 |
| Immigration Status      |                  |                        |                    | <0.0001 |
| Canadian-born           | 455 (72.1%)      | 11 (2.3%)              | 10 (4.6%)          |         |
| Immigrant < 20 yrs      | 15 (2.4%)        | 189 (38.8%)            | 81 (36.6%)         |         |
| Immigrant ≥20 yrs       | 160 (25.4%)      | 288 (59.0%)            | 123 (56.9%)        |         |
| None documented         | 1 (0.25)         | 0                      | 2 (0.9%)           |         |
| Marital Status          |                  |                        |                    | <0.0001 |
| Married/Common law      | 362 (57.4%)      | 383 (78.5%)            | 174 (80.6%)        |         |
| Other                   | 269 (42.7%)      | 105 (21.6%)            | 42 (19.5%)         |         |
| Highest level education |                  |                        |                    | 0.0001  |

|                         |             |             |             |         |
|-------------------------|-------------|-------------|-------------|---------|
| None                    | 8 (1.3%)    | 31 (6.4%)   | 7 (3.2%)    |         |
| < High School           | 94 (14.9%)  | 83 (17.0%)  | 41 (19.0%)  |         |
| ≥High School            | 529 (83.9%) | 374 (76.7%) | 168 (77.8%) |         |
| None documented         | 0           | 0           | 0           |         |
| Current smoker          | 123 (19.5%) | 53 (10.9%)  | 27 (12.5%)  | 0.0002  |
| Diabetes                | 193 (30.6%) | 224 (45.9%) | 64 (29.6%)  | <0.0001 |
| Chronic renal disease   | 74 (11.7%)  | 45 (9.2%)   | 18 (8.3%)   | 0.229   |
| Acute Coronary Syndrome |             |             |             | 0.187   |
| Unstable Angina         | 205 (32.5%) | 132 (27.1%) | 61 (28.2%)  |         |
| Non-STEMI*              | 228 (36.2%) | 208 (42.6%) | 83 (38.4%)  |         |
| STEMI                   | 188 (29.8%) | 145 (29.7%) | 68 (31.5%)  |         |
| Unspecified             | 9 (1.5%)    | 3 (0.6%)    | 4 (1.8%)    |         |

\*STEMI=ST elevation myocardial infarction

### Baseline characteristics

Over 72% of whites were Canadian-born whereas the majority of south Asians and Chinese had immigrated to Canada  $\geq 20$  years earlier. Among these three ethnic groups, whites were most likely to be a current smoker; south Asians were most likely to have diabetes; and most all participants were admitted with non-STEMI.

### ACS symptom presentation

The most common presenting symptom in each ethnic group was mid-sternal pain/discomfort of any intensity (90.4%) followed by left shoulder pain/discomfort (47.2%) (Table 2). Most of the pain or discomfort was rated as moderate to severe ( $\geq 5/10$ ) across ethnicities. Over 75% of all patients reported the classic presentation of at least moderate

intensity mid-sternal pain/discomfort, and more than 50% of all patients reported moderate to severe intensity mid-sternal chest with any of radiating left neck, shoulder or arm pain/discomfort. Chinese were less likely to report having either symptom profile relative to whites or south Asians.

Most patients described their pain or discomfort as pressure, squeezing or burning although south Asians reported significantly more stabbing pain than their counterparts. Other symptoms were also prevalent among all ethnic groups: shortness of breath (62.4%), diaphoresis (49.8%), dizziness (49.3%), and nausea/vomiting (33.1%). There were significant differences between groups in reporting these symptoms with south Asians reporting more shortness of breath, and whites reporting more diaphoresis, dizziness, and nausea and vomiting.

**Table 2.** Reported ACS symptoms by ethnicity

|                                                                              | white<br>(n=630) | south Asian<br>(n=488) | Chinese<br>(n=216) | p-value |
|------------------------------------------------------------------------------|------------------|------------------------|--------------------|---------|
| Pain/Discomfort Location                                                     |                  |                        |                    |         |
| Mid-Sternal                                                                  | 559 (88.7%)      | 438 (89.9%)            | 194 (89.8%)        | 0.828   |
| Left Shoulder                                                                | 310 (49.1%)      | 239 (49.0%)            | 72 (33.3%)         | 0.0006  |
| Left Arm                                                                     | 206 (32.7%)      | 140 (28.7%)            | 22 (10.2%)         | <0.0001 |
| Left Jaw                                                                     | 122 (19.3%)      | 67 (13.7%)             | 21 (9.7%)          | 0.003   |
| Left Neck                                                                    | 114 (18.1%)      | 69 (14.1%)             | 19 (8.8%)          | 0.0006  |
| Mid-Sternal, with Radiating Left<br>Neck, Shoulder or Arm<br>Pain/Discomfort | 435 (69.0%)      | 316 (63.8%)            | 123 (57.0%)        | <0.0001 |
| Mid-sternal Pain/Discomfort with                                             | 482 (76.5%)      | 394 (80.7%)            | 172 (79.6%)        | 0.0435  |

|                                                                                                        |             |             |             |         |
|--------------------------------------------------------------------------------------------------------|-------------|-------------|-------------|---------|
| Intensity $\otimes \geq 5$                                                                             |             |             |             |         |
| Mid-Sternal, with Radiating Left Neck, Shoulder or Arm Pain/Discomfort with Intensity $\otimes \geq 5$ | 385 (61.6%) | 285 (58.4%) | 111 (51.4%) | <0.0001 |
| Nature of Pain/Discomfort                                                                              |             |             |             |         |
| Pressure                                                                                               | 312 (49.5%) | 174 (35.7%) | 93 (43.1%)  | <0.0001 |
| Squeezing                                                                                              | 118 (18.7%) | 120 (24.6%) | 57 (26.4%)  | 0.016   |
| Burning                                                                                                | 82 (13.0%)  | 71 (14.6%)  | 25 (11.6%)  | 0.533   |
| Stabbing                                                                                               | 48 (7.6%)   | 68 (14.0%)  | 17 (7.9%)   | 0.001   |
| Shooting/Moving                                                                                        | 30 (4.8%)   | 39 (8.0%)   | 11 (5.1%)   | 0.065   |
| None                                                                                                   | 40 (6.4%)   | 16 (3.3%)   | 13 (6.0%)   | 0.059   |
| Not documented                                                                                         | 0           | 0           | 0           | ----    |
| Other Symptoms                                                                                         |             |             |             |         |
| Shortness of breath                                                                                    | 386 (61.2%) | 303 (62.1%) | 132 (61.1%) | 0.952   |
| Diaphoresis                                                                                            | 313 (49.7%) | 239 (49.0%) | 103 (47.7%) | 0.877   |
| Dizziness                                                                                              | 329 (52.2%) | 221 (45.3%) | 99 (45.8%)  | 0.047   |
| Nausea or vomiting                                                                                     | 235 (37.3%) | 145 (29.7%) | 56 (25.9%)  | 0.002   |

The pictographic analysis of the torsos (Figure 1) shows that the profiles were very similar for whites and south Asians, whereas the Chinese tended to report more central as well as less back or left arm pain/discomfort.

In the analysis stratified by ethnic group, ethnicity was not significantly associated with reporting mid-sternal pain/discomfort of any intensity. However, south Asians were significantly

more likely to report having mid-sternal pain/discomfort of moderate to severe intensity in adjusted (age and sex; age sex, education, diabetes, CKD, and STEMI versus non-STEMI/unstable angina) models (Table 3). The Chinese participants were less likely to report having radiating ACS symptoms (i.e., mid-sternal, with left neck, shoulder or arm pain or discomfort) of any as well as moderate to severe intensity, relative to whites in crude and adjusted models.

**Table 3. Crude and adjusted odds ratios for ACS symptom presentation**

| Ethnic Group                                                                           | Any Intensity     |                      |                      | Moderate to Severe Intensity |                      |                      |
|----------------------------------------------------------------------------------------|-------------------|----------------------|----------------------|------------------------------|----------------------|----------------------|
|                                                                                        | Crude OR (95%CI)  | Adjusted* OR (95%CI) | Adjusted† OR (95%CI) | Crude OR (95%CI)             | Adjusted* OR (95%CI) | Adjusted† OR (95%CI) |
| <b>At least moderate intensity mid-sternal pain/discomfort</b>                         |                   |                      |                      |                              |                      |                      |
| white                                                                                  | 1.0               | 1.0                  | 1.0                  | 1.0                          | 1.0                  | 1.0                  |
| south Asian                                                                            | 1.11 (0.76, 1.63) | 1.04 (0.70, 1.56)    | 1.03 (0.68, 1.56)    | 1.29 (0.96, 1.72)            | 1.44 (1.06, 1.96)    | 1.55 (1.13, 2.13)    |
| Chinese                                                                                | 1.12 (0.68, 1.86) | 1.12 (0.67, 1.89)    | 1.15 (0.68, 1.93)    | 1.20 (0.82, 1.75)            | 1.40 (0.95, 2.07)    | 1.48 (0.99, 2.19)    |
| <b>At least moderate mid-sternal, with left neck, shoulder, or arm pain/discomfort</b> |                   |                      |                      |                              |                      |                      |
| white                                                                                  | 1.0               | 1.0                  | 1.0                  | 1.0                          | 1.0                  | 1.0                  |
| south Asian                                                                            | 0.86 (0.68, 1.10) | 0.83 (0.64, 1.06)    | 0.81 (0.63, 1.05)    | 0.94 (0.74, 1.19)            | 0.95 (0.74, 1.21)    | 0.83 (0.64, 1.08)    |
| Chinese                                                                                | 0.44 (0.32, 0.61) | 0.45 (0.32, 0.62)    | 0.45 (0.32, 0.63)    | 0.50 (0.36, 0.69)            | 0.53 (0.38, 0.74)    | 0.46 (0.33, 0.64)    |

\*adjusted for age & sex; †adjusted for age, sex, education, current smoker, diabetes, CKD, and STEMI vs Non-STEMI/unstable angina

### **Time to emergency room presentation and cardiac catheterization, and care outcomes**

The mean time to emergency room presentation, for those who had a distinct time of symptom onset, was 5.53 to 7.41 hours (Table 4). South Asians with atypical symptoms had significantly longer delays in arrival to the emergency department than those who had any typical symptoms. The mean time to receipt of cardiac catheterization following emergency room presentation was 3.00-3.93 hours. Whites with atypical symptoms had significantly longer delays in time to receipt of cardiac catheterization than those with typical symptoms. South Asian participants who had any typical mid-sternal pain/discomfort were more likely to receive

PCI but less likely to receive CABG than those with atypical symptoms. Table 4 also shows that south Asian participants who had any typical mid-sternal with left neck, shoulder, or arm pain/discomfort were more likely to receive PCI than those who had atypical symptoms.

**Table 4.** Time to emergency room presentation and cardiac catheterization, and care outcomes by symptoms and ethnicity

|                                                                          | white              |                     |             | south Asian        |                    |             | Chinese            |                    |             |
|--------------------------------------------------------------------------|--------------------|---------------------|-------------|--------------------|--------------------|-------------|--------------------|--------------------|-------------|
|                                                                          | Typical<br>(n=482) | Atypical<br>(n=148) | p-<br>value | Typical<br>(n=394) | Atypical<br>(n=94) | p-<br>value | Typical<br>(n=172) | Atypical<br>(n=44) | p-<br>value |
| <b>Any mid-sternal pain/discomfort</b>                                   | n=451              | n=116               |             | n=359              | n=71               |             | n=144              | n=32               |             |
| Time to ER presentation (hours; if distinct time of onset) Mean (SD)     | 6.43 (5.77)        | 6.11 (5.53)         | 0.591       | 5.69 (5.35)        | 7.17 (5.94)        | 0.037       | 5.92 (5.49)        | 7.41 (6.10)        | 0.176       |
| Median (IQR)                                                             | 3.0 (6.5)          | 3.0 (6.0)           | 0.872       | 3.0 (6.0)          | 5.0 (6.5)          | 0.127       | 3.0 (6.0)          | 6.0 (6.5)          | 0.318       |
| Time to CATH* (hours) Mean (SD)                                          | 3.35 (1.76)        | 3.93 (1.57)         | 0.001       | 3.10 (1.80)        | 3.10 (1.72)        | 0.975       | 3.09 (1.82)        | 3.58 (1.72)        | 0.134       |
| Median (IQR)                                                             | 4.0 (2.0)          | 5.0 (1.0)           | 0.002       | 3.0 (2.0)          | 2.0 (2.0)          | 0.862       | 3.0 (2.0)          | 5.0 (1.5)          | 0.109       |
|                                                                          | n (%)              | n (%)               |             | n (%)              | n (%)              |             | N (%)              | n (%)              |             |
| CATH                                                                     | 402 (83.4%)        | 124 (83.8%)         | 0.913       | 359 (91.1%)        | 81 (86.2%)         | 0.148       | 151 (87.8%)        | 38 (86.4%)         | 0.826       |
| PCI <sup>†</sup>                                                         | 228 (47.3%)        | 60 (40.5%)          | 0.149       | 211 (53.6%)        | 36 (38.3%)         | 0.008       | 81 (47.1%)         | 19 (43.2%)         | 0.777       |
| CABG <sup>‡</sup>                                                        | 44 (9.1%)          | 17 (11.5%)          | 0.396       | 38 (9.6%)          | 16 (17.0%)         | 0.041       | 13 (7.6%)          | 5 (11.4%)          | 0.636       |
| <b>Any mid-sternal, with left neck, shoulder, or arm pain/discomfort</b> | n=330              | n=237               |             | n=234              | n=196              |             | n=68               | n=108              |             |
| Time to ER presentation (hours; if distinct time of onset) Mean (SD)     | 6.41 (5.82)        | 6.31 (5.57)         | 0.836       | 5.53 (5.35)        | 6.42 (5.60)        | 0.092       | 6.0 (5.65)         | 6.31 (5.62)        | 0.726       |
| Median (IQR)                                                             | 3.0 (6.5)          | 3.0 (3.0)           | 0.926       | 2.0 (6.0)          | 3.0 (6.5)          | 0.037       | 3.0 (6.0)          | 3.0 (6.0)          | 0.649       |
| Time to CATH* (hours) Mean (SD)                                          | 3.40 (1.76)        | 3.61 (1.68)         | 0.154       | 3.0 (1.77)         | 3.2 (1.79)         | 0.241       | 3.28 (1.81)        | 3.14 (1.81)        | 0.615       |
| Median (IQR)                                                             | 4.0 (2.0)          | 5.0 (1.5)           | 0.192       | 3.0 (2.0)          | 3.0 (2.0)          | 0.202       | 4.0 (2.0)          | 3.0 (2.0)          | 0.635       |
|                                                                          | n (%)              | n (%)               |             | n (%)              | n (%)              |             | n (%)              | n (%)              |             |
| CATH                                                                     | 306 (86.0%)        | 220 (80.3%)         | 0.058       | 235 (91.1%)        | 205 (89.1%)        | 0.469       | 65 (82.3%)         | 124 (90.5%)        | 0.126       |
| PCI                                                                      | 172 (48.3%)        | 116 (42.3%)         | 0.135       | 143 (55.4%)        | 104 (45.2%)        | 0.024       | 41 (51.9%)         | 59 (43.1%)         | 0.361       |
| CABG                                                                     | 33 (9.3%)          | 28 (10.2%)          | 0.690       | 30 (11.6%)         | 24 (10.4%)         | 0.675       | 4 (5.1%)           | 14 (10.2%)         | 0.307       |

\*CATH=catheterization; <sup>†</sup>PCI=percutaneous coronary intervention; <sup>‡</sup>CABG=coronary artery bypass graft surgery

However, after adjustment for potential confounding, south Asians with atypical symptoms were less likely to receive PCI than those with typical symptoms (Table 5).

**Table 5.** Crude and adjusted odds ratios for care outcomes

| <b>Atypical vs typical</b>                                               | <b>Crude OR (95% CI)</b> | <b>Adjusted* OR (95% CI)</b> |
|--------------------------------------------------------------------------|--------------------------|------------------------------|
| <b>Any mid-sternal pain/discomfort</b>                                   |                          |                              |
| CATH <sup>†</sup>                                                        |                          |                              |
| white                                                                    | 1.03 (0.62, 1.69)        | 1.11 (0.64, 1.95)            |
| south Asian                                                              | 0.61 (0.31, 1.20)        | 0.71 (0.34, 1.48)            |
| Chinese                                                                  | 0.89 (0.33, 2.35)        | 0.77 (0.27, 2.14)            |
| PCI <sup>§</sup>                                                         |                          |                              |
| white                                                                    | 0.76 (0.52, 1.10)        | 0.82 (0.54, 1.24)            |
| south Asian                                                              | 0.54 (0.34, 0.85)        | 0.56 (0.33, 0.94)            |
| Chinese                                                                  | 0.87 (0.45, 1.69)        | 0.81 (0.38, 1.72)            |
| CABG <sup>**</sup>                                                       |                          |                              |
| white                                                                    | 1.29 (0.71, 2.34)        | 1.24 (0.67, 2.30)            |
| south Asian                                                              | 1.92 (1.02, 3.62)        | 1.84 (0.95, 3.56)            |
| Chinese                                                                  | 1.63 (0.56, 4.73)        | 1.42 (0.45, 4.47)            |
| <b>Any mid-sternal, with left neck, shoulder, or arm pain/discomfort</b> |                          |                              |
| CATH                                                                     |                          |                              |
| white                                                                    | 0.67 (0.44, 1.02)        | 0.74 (0.46, 1.17)            |
| south Asian                                                              | 0.80 (0.44, 1.46)        | 0.93 (0.49, 1.76)            |
| Chinese                                                                  | 2.08 (0.92, 4.68)        | 2.37 (0.98, 5.72)            |
| PCI                                                                      |                          |                              |
| white                                                                    | 0.79 (0.57, 1.08)        | 0.79 (0.56, 1.12)            |
| south Asian                                                              | 0.66 (0.46, 0.95)        | 0.72 (0.48, 1.08)            |
| Chinese                                                                  | 0.69 (0.40, 1.21)        | 0.60 (0.32, 1.14)            |
| CABG                                                                     |                          |                              |
| white                                                                    | 1.11 (0.66, 1.89)        | 1.09 (0.63, 1.87)            |
| south Asian                                                              | 0.89 (0.50, 1.56)        | 0.90 (0.49, 1.64)            |
| Chinese                                                                  | 1.82 (0.63, 5.31)        | 2.11 (0.68, 6.56)            |

\*adjusted for age, sex, education, current smoker, diabetes, CKD, and STEMI vs Non-STEMI/unstable angina

<sup>†</sup>CATH=catheterization; <sup>§</sup> PCI=percutaneous coronary intervention; <sup>\*\*</sup>CABG=coronary artery bypass graft surgery

## DISCUSSION

The classic (typical) presentation of moderate to severe intensity mid-sternal chest pain or discomfort was the most common presenting ACS symptom across ethnic groups. Yet, a substantial proportion of patients, up to one third, in each group studied had non-classic (atypical) ACS presentations. Differences in ACS symptom presentation among whites, south



1  
2  
3 Asians, and Chinese patients were statistically and clinically significant, as south Asians were  
4 more likely to present with classic ACS symptoms and Chinese were less likely to present with  
5 radiating symptoms in all models relative to whites. Our study extends the findings from  
6  
7  
8  
9  
10 previous work by employing rigorous cross cultural and language adaptation of study  
11  
12  
13 questionnaires, and including visual diagrams across multiple centers.

14  
15 Findings from other studies have some similar conclusions. Like the south Asian and  
16  
17 Chinese participants in our study, Blacks have been reported to have a similar prevalence of  
18  
19 chest pain relative to whites.<sup>6-9</sup> Yet, other studies suggest that non-white patients with ACS are  
20  
21 more likely to have chest pain than whites. A study from a single hospital in the United Kingdom  
22  
23 reported south Asians are more frequently to have 'classic chest pain with radiation' than whites  
24  
25 (90 vs. 82%).<sup>10</sup> A study of 390 ACS patients residing in the Asia-Pacific rim revealed patients  
26  
27 from India, China and Korea were significantly more likely to report typical pain than their white  
28  
29 counterparts.<sup>11</sup> A small study of whites, Blacks (US-residents), and Koreans (Korea-residents)  
30  
31 revealed Koreans reported significantly more frequent and greater radiation of chest pain.<sup>8</sup> Yet,  
32  
33 our earlier study from a single health region, revealed that south Asian and Chinese AMI patients  
34  
35 were less likely to report classic symptom presentation.<sup>19</sup> These inconsistencies may be  
36  
37 explained by the controlled analyses we used, and the lack of cross cultural (and language)  
38  
39 adaptation in other studies.

40  
41  
42  
43  
44 We found significant differences among ethnic groups in the nature of the  
45  
46 pain/discomfort as well as the presence of additional symptoms. Culture may influence patients  
47  
48 identifying, recognizing, and acknowledging urgent symptoms as such, as well as making the  
49  
50 decision to seek care. Single centre studies revealed that south Asians and Chinese with AMI  
51  
52 tended to report atypical symptoms and did not recognize or accept their symptoms as  
53  
54  
55  
56  
57  
58  
59

1  
2  
3 ‘urgent’.<sup>19,22</sup> Studies<sup>23-26</sup> suggest that expression of symptoms, and language and semantic  
4 differences of symptom descriptors may account for discrepancies in reporting symptoms.  
5  
6 Further, pain/discomfort are subjective experiences, thus how they are identified and portrayed  
7  
8 are culturally bound.<sup>25,26</sup> For example, the Worcester Heart Attack Study revealed that south  
9  
10 Asian participants were significantly less accepting of overtly expressing pain, but showed no  
11  
12 difference in reporting pain intensity than white participants.<sup>21</sup>  
13  
14  
15

16  
17 We identified little overall ethnic variation in time to emergency room presentation,  
18  
19 though south Asians who had atypical symptoms were more likely to have a longer time to  
20  
21 presentation to the emergency room (mean of 1.48 hours longer) relative to those who had  
22  
23 typical symptoms. In a study of 440,398 registry patients, Ting et al.<sup>27</sup> demonstrated that delays  
24  
25 from symptom onset to emergency room presentation were associated with reduced likelihoods  
26  
27 of receiving any reperfusion therapy in the general population. Authors of other American  
28  
29 studies have demonstrated ethnic (e.g., African Americans, Hispanics, Pacific Islanders)  
30  
31 differences relative to whites in longer time to emergency room presentation and reduced access  
32  
33 to treatment (reperfusion therapies) for ACS events.<sup>28-30</sup>  
34  
35  
36

37  
38 South Asians who had typical mid-sternal pain/discomfort symptoms were more likely to  
39  
40 receive PCI and significantly less likely to receive CABG than those who had atypical  
41  
42 symptoms. Overall, and after adjustment, south Asians with atypical symptoms were less likely  
43  
44 to receive PCI than those with typical symptoms. The reasons for this difference are not clear. It  
45  
46 is possible that south Asians with atypical presentations arrive too late for emergent coronary  
47  
48 revascularization; there are biases from health care providers; or this population may be more  
49  
50 likely to refuse invasive cardiovascular procedures.  
51  
52

### 53 54 **Study limitations**

55  
56  
57  
58  
59  
60

1  
2  
3 We employed a rigorous approach to comparing symptom presentation between cultural  
4 groups in this large cross-sectional study. We included participants who spoke a variety of  
5 languages, used highly systematic and validated translation and data collection processes, and  
6 had a large sample size. However, there were some limitations. First, we studied participants  
7 who survived their ACS event. It is not possible to know if patients who succumbed to their ACS  
8 event or did not seek care had different symptoms than those who were diagnosed and survived.  
9  
10 Second, we studied only those who agreed to participate. The proportion of south Asian and  
11 Chinese patients approached to participate and who refused was noteworthy. Third, we studied  
12 only patients in Canada who were admitted to selected hospitals.  
13  
14  
15  
16  
17  
18  
19  
20  
21  
22  
23

## 24 **Conclusions**

25  
26 A substantial proportion of white, south Asian and Chinese patients with ACS do not  
27 report classic ACS symptoms. Differences in ACS symptoms presentation among whites, south  
28 Asians, and Chinese patients are significant with south Asians being more likely to report mid-  
29 sternal pain/discomfort and Chinese being less likely to report radiating pain/discomfort, relative  
30 to whites. On the whole, the mean time to emergency room presentation was unacceptably long  
31 for each ethnic group and especially so for south Asians. These delays can reduce the  
32 opportunity to receive evidence-based reperfusion therapies. From a public health perspective,  
33 we need to include non-chest pain symptoms for screening and public awareness campaigns for  
34 ACS among south Asian, Chinese and white persons.  
35  
36  
37  
38  
39  
40  
41  
42  
43  
44  
45  
46  
47  
48  
49  
50  
51  
52  
53  
54  
55  
56  
57  
58  
59  
60

## ACKNOWLEDGEMENTS

The study team gratefully acknowledges the contributions of Pamela LeBlanc, for managing the study, as well as Elizabeth Lavigne and Jo-Ann Sawatzky for leading two of the study sites. Data management services were provided by EPICORE Centre, University of Alberta.

## COMPETING INTERESTS

RT reports grants from Merck Canada, personal fees from Merck Canada, outside the submitted work.

## SOURCES OF FUNDING

This work was supported by the Canadian Institutes of Health Research and the Guru Nanak Dev Ji DIL Research Chair.

KKS was supported by Alberta Innovates Health Solutions (Health Scholar) and currently by the DIL Walk Foundation.

HQ was supported by Alberta Innovates Health Solutions (Health Scholar)

MK was supported by a Career Investigator Award from the Heart and Stroke Foundation.

Ontario Provincial Office

NK was supported by a Michael Smith Foundation for Health Research Career Scientist award.

## AUTHORS' CONTRIBUTION

All authors have met the ICMJE recommendations regarding authorship.

KKS, HQ and NK conceived the study.

KKS, HQ, RT, and NK made substantial contributions to the design of the work.

MK, LA, SB, and NK made substantial contributions to the acquisition of data.

KKS, HQ, RT, DS, and NK made substantial contributions to the analysis

1  
2  
3 KKS, HQ, MK, RT, LA, SB, DS, and NK made substantial contributions to the interpretation of  
4  
5 the data  
6

7  
8 KKS, HQ, MK, RT, LA, SB, DS, and NK made substantial contributions to drafting the work or  
9  
10 revising it critically for important intellectual content, and made final approval of the version to  
11  
12 be published.  
13

14  
15 KKS, HQ, MK, RT, LA, SB, DS, and NK agree to be accountable for all aspects of the work in  
16  
17 ensuring that questions related to the accuracy or integrity of any part of the work are  
18  
19 appropriately investigated and resolved.  
20

## 21 **DATA SHARING STATEMENT**

22  
23  
24 Data are housed at the University of Calgary and are not available at this time.  
25  
26  
27  
28  
29  
30  
31  
32  
33  
34  
35  
36  
37  
38  
39  
40  
41  
42  
43  
44  
45  
46  
47  
48  
49  
50  
51  
52  
53  
54  
55  
56  
57  
58  
59  
60

**REFERENCES**

1. World Health Organization. Media Centre – Cardiovascular Diseases (CVDs). Available at: [www.who.int/mediacentre/factsheets/fs317/en/](http://www.who.int/mediacentre/factsheets/fs317/en/). Accessed on February 12, 2016.
2. Vedanthan R, Seligman B, Fuster V. Global perspective on acute coronary syndrome. A burden on the young and poor. *Circ Res* 2014;114(12):1959-75.
3. El-Menyar A, Zubaid M, Sulaiman K, *et al.*, for the Gulf Registry of Acute Coronary Events (Gulf RACE) Investigators. Atypical presentation of acute coronary syndrome: A significant independent predictor of in-hospital mortality. *J Cardiol* 2011;57(2):165-71.
4. Anderson J, Adams C, Antman E, *et al.* ACC/AHA 2007 guidelines for the management of patients with unstable angina/non-ST-elevation myocardial infarction: A report of the American College of Cardiology/American Heart Association Task Force on practice guidelines. *J Am Coll Cardiol* 2007;50:e1-157.
5. Thérroux P, Fuster V. Acute coronary syndromes. Unstable angina and non-Q-wave myocardial infarction. *Circ* 1998;97(12):1195-206.
6. Lee H, Bahler R, Chung C, Alonzo A, Zeller RA. Prehospital delay with myocardial infarction: the interactive effect of clinical symptoms and race. *App Nurs Res* 2000; 13(3):125-33.
7. Klinger D, Green-Weir R, Nerenz D, *et al.* Perceptions of chest pain differ by race. *Am Heart J* 2002;144(1):51-9.
8. Lee H, Bahler R, Park OJ, Kim CJ, Lee HY, Kim YJ. Typical and atypical symptoms of myocardial infarction among African Americans, Whites, and Koreans. *Crit Care Nurs Clin N Amer* 2001;13(4):531-9.

- 1  
2  
3 9. Hravnak M, Whittle J, Kelley ME, et al. Symptom expression in coronary heart disease and  
4 revascularization recommendations for Black and White patients. *Am J Public Health*  
5  
6 2007;97(9):1701-8.  
7  
8
- 9  
10 10. Teoh M, Lalondrelle S, Roughton M, Grocott-Mason R, Dubrey SW. Acute coronary  
11 syndromes and their presentation in Asian and Caucasian patients in Britain. *Heart* 2007;  
12  
13 93(2):183-8.  
14  
15
- 16  
17 11. Greenslade JH, Cullen L, Parsonage W, et al. Examining the signs and symptoms  
18 experienced by individuals with suspected acute coronary syndrome in the Asia-Pacific  
19 region: A prospective observational study. *Ann Emerg Med* 2012;60(6):777-85.  
20  
21  
22
- 23  
24 12. Statistics Canada. Immigration and Ethnocultural Diversity in Canada. National Household  
25 Survey, 2011. Catalogue no. 99-010-X2011001. Available at: [www12.statcan.gc.ca/nhs-](http://www12.statcan.gc.ca/nhs-enm/2011/as-sa/99-010-x/99-010-x2011001-eng.pdf)  
26  
27 [enm/2011/as-sa/99-010-x/99-010-x2011001-eng.pdf](http://www12.statcan.gc.ca/nhs-enm/2011/as-sa/99-010-x/99-010-x2011001-eng.pdf). Accessed March 8, 2016.  
28  
29
- 30  
31 13. Rana A, de Souza RJ, Kandasamy S, Lear SA, Anand SS. Cardiovascular risk among South  
32 Asians living in Canada: A systematic review and meta-analysis. *CMAJ Open* 2014;2(3):  
33  
34 E183-91.  
35  
36
- 37  
38 14. Khan NA, Grubisic M, Hemmelgarn B, Humphries K, King KM, Quan H. Outcomes after  
39 acute myocardial infarction in South Asian, Chinese, and White patients. *Circ* 2010;  
40  
41 122(16):1570-7.  
42  
43
- 44  
45 15. Zaman MJS, Philipson P, Chen R, et al. South Asians and coronary disease: Is there a  
46 discordance between effects on incidence and prognosis? *Heart* 2013;99(10):729-36.  
47  
48
- 49  
50 16. Jin K, Ding D, Gullick J, Koo F, Neubeck L. A Chinese immigrant paradox? Low coronary  
51 heart disease incidence but higher short-term mortality in Western-dwelling Chinese  
52 immigrants: A systematic review and meta-analysis. *J Am Heart Assoc* 2015;4:e002568  
53  
54  
55  
56  
57  
58  
59

17. Moran A, Gu D, Zhao D, *et al*. Future cardiovascular disease in China: Markov model and risk factor scenario projections from the coronary heart disease policy model-China. *Circ Cardiovasc Qual Outcomes* 2010;3(3):2432-52.
18. King KM, Khan N, LeBlanc P, Quan H. Establishing translational and conceptual equivalence of survey questionnaires for a multi-ethnic, multi-language study. *J Adv Nurs* 2011;67(10):2267-74.
19. King KM, Khan N, Quan H. Ethnic variation in acute myocardial infarction presentation and access to care. *Am J Cardiol* 2009;103(10):1368-73.
20. King-Shier KM, Singh S, LeBlanc P, *et al*. The influence of ethnicity and gender on navigating an acute coronary syndrome event. *Euro J Cardiovasc Nurs* 2015;14(3):240-47.
21. Milner KA, Vaccarino V, Arnold AL, Funk M, Goldbert RJ. Gender and age differences in chief complaints of acute myocardial infarction (Worcester Heart Attack Study). *Am J Cardiol* 2004;93(5):606-8.
22. Chan C-W, Lopez V, Chung JWY. Chest pain description and recognition among Chinese people with coronary problems. *World Crit Care Nurs* 2008;6(4):66-8.
23. Surgeon General. Mental Health: Culture, race and ethnicity: A supplement to mental health: A report of the Surgeon General. Substance Abuse and Mental Health Services Administration. Available at: [www.ncbi.nlm.nih.gov/books/NBK44249/](http://www.ncbi.nlm.nih.gov/books/NBK44249/). Accessed on April 7, 2016.
24. Kleinman A. Depression, somatization and the "new cross-cultural psychiatry." *Soc Sci Med* 1977;11(1):3-9.
25. Galanti G-A. *Caring for Patients from Different Cultures*. 5<sup>th</sup> ed. Pittsburgh, PA: University of Pennsylvania Press 2015.



- 1  
2  
3 26. Nayak S, Shiflett SC, Eshun S, Levine FM. Culture and gender effects in pain beliefs and  
4 the prediction of pain tolerance. *Cross-Cultur Res* 2000;34(2):135-51.  
5  
6  
7  
8 27. Ting HH, Bradley EH, Wang Y, *et al.* Delay in presentation and reperfusion therapy in ST-  
9 elevation myocardial infarction. *Am J Med* 2008;121(4):316–23.  
10  
11  
12 28. Bradley EH, Herrin J, Wang Y, *et al.* Racial and ethnic differences in time to acute  
13 reperfusion therapy for patients hospitalized with myocardial infarction. *JAMA*  
14 2004;292(13): 1563-72.  
15  
16  
17  
18  
19 29. Graham G. Racial and ethnic differences in acute coronary syndrome and myocardial  
20 infarction within the United States: From demographics to outcomes. *Clin Cardiol*  
21 2016;39(5):1-8.  
22  
23  
24  
25  
26 30. Vaccarino V, Rathore SS, Wenger NK, *et al.*, for the National Registry of Myocardial  
27 Infarction Investigators. Sex and racial differences in the management of acute myocardial  
28 infarction, 1994 through 2002. *N Engl J Med* 2005;353:671-82.  
29  
30  
31  
32  
33  
34  
35  
36  
37  
38  
39  
40  
41  
42  
43  
44  
45  
46  
47  
48  
49  
50  
51  
52  
53  
54  
55  
56  
57  
58  
59  
60

1  
2  
3 **Figure 1. Pictographic for Each Ethnic Group**  
4

5 The colour gradient (white/purple to red) indicates no/few participants to most (>65%) of  
6 participants identified pain/discomfort in that location.  
7  
8  
9  
10  
11  
12  
13  
14  
15  
16  
17  
18  
19  
20  
21  
22  
23  
24  
25  
26  
27  
28  
29  
30  
31  
32  
33  
34  
35  
36  
37  
38  
39  
40  
41  
42  
43  
44  
45  
46  
47  
48  
49  
50  
51  
52  
53  
54  
55  
56  
57  
58  
59  
60

For peer review only

1  
2  
3  
4  
5  
6  
7  
8  
9  
10  
11  
12  
13  
14  
15  
16  
17  
18  
19  
20  
21  
22  
23  
24  
25  
26  
27  
28  
29  
30  
31  
32  
33  
34  
35  
36  
37  
38  
39  
40  
41  
42  
43  
44  
45  
46  
47  
48  
49  
50  
51  
52  
53  
54  
55  
56  
57  
58  
59  
60

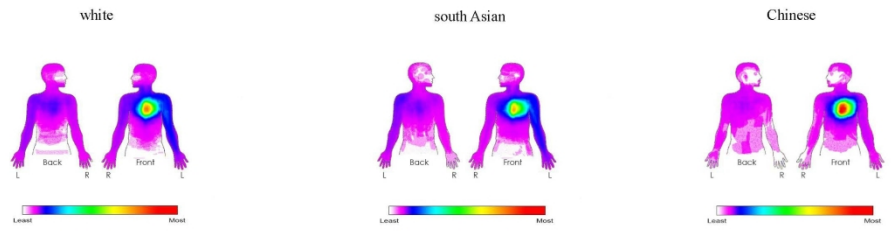

279x215mm (220 x 220 DPI)

STROBE Statement—checklist of items that should be included in reports of observational studies

| Item No             | Recommendation                                                                                                                                                                                                                                                                                                                                                                                                                                                                                                                                                                                                                                                                                   |
|---------------------|--------------------------------------------------------------------------------------------------------------------------------------------------------------------------------------------------------------------------------------------------------------------------------------------------------------------------------------------------------------------------------------------------------------------------------------------------------------------------------------------------------------------------------------------------------------------------------------------------------------------------------------------------------------------------------------------------|
| 1                   | (a) Indicate the study's design with a commonly used term in the title or the abstract<br>(b) Provide in the abstract an informative and balanced summary of what was done and what was found                                                                                                                                                                                                                                                                                                                                                                                                                                                                                                    |
| <b>Introduction</b> |                                                                                                                                                                                                                                                                                                                                                                                                                                                                                                                                                                                                                                                                                                  |
| 2                   | Explain the scientific background and rationale for the investigation being reported                                                                                                                                                                                                                                                                                                                                                                                                                                                                                                                                                                                                             |
| 3                   | State specific objectives, including any prespecified hypotheses                                                                                                                                                                                                                                                                                                                                                                                                                                                                                                                                                                                                                                 |
| <b>Methods</b>      |                                                                                                                                                                                                                                                                                                                                                                                                                                                                                                                                                                                                                                                                                                  |
| 4                   | Present key elements of study design early in the paper                                                                                                                                                                                                                                                                                                                                                                                                                                                                                                                                                                                                                                          |
| 5                   | Describe the setting, locations, and relevant dates, including periods of recruitment, exposure, follow-up, and data collection                                                                                                                                                                                                                                                                                                                                                                                                                                                                                                                                                                  |
| 6                   | (a) <i>Cohort study</i> —Give the eligibility criteria, and the sources and methods of selection of participants. Describe methods of follow-up<br><i>Case-control study</i> —Give the eligibility criteria, and the sources and methods of case ascertainment and control selection. Give the rationale for the choice of cases and controls<br><i>Cross-sectional study</i> —Give the eligibility criteria, and the sources and methods of selection of participants<br>(b) <i>Cohort study</i> —For matched studies, give matching criteria and number of exposed and unexposed<br><i>Case-control study</i> —For matched studies, give matching criteria and the number of controls per case |
| 7                   | Clearly define all outcomes, exposures, predictors, potential confounders, and effect modifiers. Give diagnostic criteria, if applicable                                                                                                                                                                                                                                                                                                                                                                                                                                                                                                                                                         |
| 8*                  | For each variable of interest, give sources of data and details of methods of assessment (measurement). Describe comparability of assessment methods if there is more than one group                                                                                                                                                                                                                                                                                                                                                                                                                                                                                                             |
| 9                   | Describe any efforts to address potential sources of bias                                                                                                                                                                                                                                                                                                                                                                                                                                                                                                                                                                                                                                        |
| 10                  | Explain how the study size was arrived at                                                                                                                                                                                                                                                                                                                                                                                                                                                                                                                                                                                                                                                        |
| 11                  | Explain how quantitative variables were handled in the analyses. If applicable, describe which groupings were chosen and why                                                                                                                                                                                                                                                                                                                                                                                                                                                                                                                                                                     |
| 12                  | (a) Describe all statistical methods, including those used to control for confounding<br>(b) Describe any methods used to examine subgroups and interactions<br>(c) Explain how missing data were addressed<br>(d) <i>Cohort study</i> —If applicable, explain how loss to follow-up was addressed<br><i>Case-control study</i> —If applicable, explain how matching of cases and controls was addressed<br><i>Cross-sectional study</i> —If applicable, describe analytical methods taking account of sampling strategy<br>(e) Describe any sensitivity analyses                                                                                                                                |

Continued on next page

none

BMJ Open

**Results**

Participants 13\* (a) Report numbers of individuals at each stage of study—eg numbers potentially eligible, examined for eligibility, confirmed eligible, included in the study, completing follow-up, and analysed ✓ Pg 8

(b) Give reasons for non-participation at each stage ✓ Pg 8

(c) Consider use of a flow diagram

Descriptive data 14\* (a) Give characteristics of study participants (eg demographic, clinical, social) and information on exposures and potential confounders ✓ pp 8-10

(b) Indicate number of participants with missing data for each variable of interest

(c) *Cohort study*—Summarise follow-up time (eg, average and total amount)

Outcome data 15\* *Cohort study*—Report numbers of outcome events or summary measures over time

*Case-control study*—Report numbers in each exposure category, or summary measures of exposure ✓ pp 9-14

*Cross-sectional study*—Report numbers of outcome events or summary measures ✓ pp 9-14

Main results 16 (a) Give unadjusted estimates and, if applicable, confounder-adjusted estimates and their precision (eg, 95% confidence interval). Make clear which confounders were adjusted for and why they were included ✓ pp 9-14

(b) Report category boundaries when continuous variables were categorized

(c) If relevant, consider translating estimates of relative risk into absolute risk for a meaningful time period

Other analyses 17 Report other analyses done—eg analyses of subgroups and interactions, and sensitivity analyses

**Discussion**

Key results 18 Summarise key results with reference to study objectives ✓ pp 14-16

Limitations 19 Discuss limitations of the study, taking into account sources of potential bias or imprecision. ✓ pg 17

Discuss both direction and magnitude of any potential bias

Interpretation 20 Give a cautious overall interpretation of results considering objectives, limitations, multiplicity of analyses, results from similar studies, and other relevant evidence ✓ pg 17

Generalisability 21 Discuss the generalisability (external validity) of the study results ✓ pg 17

**Other information**

Funding 22 Give the source of funding and the role of the funders for the present study and, if applicable, for the original study on which the present article is based ✓ pg 18

\*Give information separately for cases and controls in case-control studies and, if applicable, for exposed and unexposed groups in cohort and cross-sectional studies.

**Note:** An Explanation and Elaboration article discusses each checklist item and gives methodological background and published examples of transparent reporting. The STROBE checklist is best used in conjunction with this article (freely available on the Web sites of PLoS Medicine at <http://www.plosmedicine.org/>, Annals of Internal Medicine at <http://www.annals.org/>, and Epidemiology at <http://www.epidem.com/>). Information on the STROBE Initiative is available at [www.strobe-statement.org](http://www.strobe-statement.org).



# BMJ Open

## ACUTE CORONARY SYNDROMES PRESENTATIONS AND CARE OUTCOMES IN WHITE, SOUTH ASIAN, AND CHINESE PATIENTS: A COHORT STUDY

|                                 |                                                                                                                                                                                                                                                                                                                                                                                                                                                                                                                                                   |
|---------------------------------|---------------------------------------------------------------------------------------------------------------------------------------------------------------------------------------------------------------------------------------------------------------------------------------------------------------------------------------------------------------------------------------------------------------------------------------------------------------------------------------------------------------------------------------------------|
| Journal:                        | <i>BMJ Open</i>                                                                                                                                                                                                                                                                                                                                                                                                                                                                                                                                   |
| Manuscript ID                   | bmjopen-2018-022479.R1                                                                                                                                                                                                                                                                                                                                                                                                                                                                                                                            |
| Article Type:                   | Research                                                                                                                                                                                                                                                                                                                                                                                                                                                                                                                                          |
| Date Submitted by the Author:   | 02-Oct-2018                                                                                                                                                                                                                                                                                                                                                                                                                                                                                                                                       |
| Complete List of Authors:       | King-Shier, Kathryn; University of Calgary, Nursing<br>Quan, Hude; University of Calgary, Community Health Sciences<br>Kapral, MK; University of Toronto, Department of Medicine, Division of General Internal Medicine<br>Tsuyuki, Ross; University of Alberta, Faculty of Medicine and Dentistry<br>An, Libin; Dalian University, School of Nursing<br>Banerjee, Suvro; Apollo Gleneagles Hospital, Cardiology<br>Southern, Danielle; University of Calgary, Community Health Sciences<br>Khan, Nadia; University of British Columbia, Medicine |
| <b>Primary Subject Heading</b>: | Cardiovascular medicine                                                                                                                                                                                                                                                                                                                                                                                                                                                                                                                           |
| Secondary Subject Heading:      | Health services research                                                                                                                                                                                                                                                                                                                                                                                                                                                                                                                          |
| Keywords:                       | ethnicity, acute coronary syndrome, symptoms, care access                                                                                                                                                                                                                                                                                                                                                                                                                                                                                         |
|                                 |                                                                                                                                                                                                                                                                                                                                                                                                                                                                                                                                                   |

SCHOLARONE™  
 Manuscripts

1  
2  
3 **ACUTE CORONARY SYNDROMES PRESENTATIONS AND CARE OUTCOMES IN**  
4 **WHITE, SOUTH ASIAN, AND CHINESE PATIENTS: A COHORT STUDY**  
5  
6

7 Kathryn M. King-Shier, RN, PhD<sup>1,2</sup>

8 Hude Quan, MD, PhD<sup>2</sup>

9  
10 Moira Kapral, MD, MSc<sup>3</sup>

11  
12 Ross Tsuyuki, PharmD, MSc<sup>4</sup>

13  
14 Libin An, MD, PhD<sup>5</sup>

15  
16 Suvro Banerjee, MD<sup>6</sup>

17  
18 Danielle A. Southern, MSc<sup>2</sup>

19  
20 Nadia Khan, MD, MSc<sup>7</sup>

21  
22 <sup>1</sup> Faculty of Nursing, University of Calgary, Calgary, Alberta, Canada

23  
24 <sup>2</sup> Department of Community Health Sciences, Cumming School of Medicine, University of  
25  
26 Calgary, Calgary, Alberta, Canada

27  
28 <sup>3</sup> Department of Medicine, Division of General Internal Medicine, University of Toronto,  
29  
30 Toronto, Canada.

31  
32 <sup>4</sup> Division of Cardiology, Faculty of Medicine and Dentistry, University of Alberta, Edmonton,  
33  
34 Alberta, Canada

35  
36 <sup>5</sup> School of Nursing, Dalian University, Dalian, China

37  
38 <sup>6</sup> Apollo Gleneagles Hospital, Kolkata, India

39  
40 <sup>7</sup> Department of Medicine, Faculty of Medicine, Center for Health Evaluation and Outcomes  
41  
42 Sciences, University of British Columbia, Vancouver, British Columbia, Canada

43  
44 **CORRESPONDING AUTHOR:**

45 Kathryn M. King-Shier  
46 Faculty of Nursing, University of Calgary  
47 2500 University Drive NW  
48 Calgary, Alberta, Canada T2N 1N4  
49 403-220-4643 (telephone)  
50 403-210-8601 (fax)  
51 kingk@ucalgary.ca

52  
53 **WORD COUNT: 3974**  
54  
55  
56  
57  
58  
59

## ABSTRACT

**Objectives.** Successful treatment of acute coronary syndrome (ACS) relies on its rapid recognition. It is unclear whether the accepted presentation of chest pain applies to different ethnic groups. We thus examined potential ethnic variations in ACS symptoms and clinical care outcomes in white, south Asian, and Chinese patients.

**Design.** Cross sectional survey.

**Setting.** Participants were hospitalized at one of 12 Canadian centres across 4 provinces.

**Participants.** 1334 ACS patients (630 white; 488 south Asian; 216 Chinese).

**Main outcome measures.** ACS presentation symptoms (classic/typical mid-sternal pain/discomfort with or without radiation to the left neck, shoulder or arm) were assessed by self-report. Clinical **care** outcomes (time to emergency room (ER) presentation, cardiac catheterization; receipt of cardiac catheterization, percutaneous coronary intervention (PCI) or coronary artery bypass grafting (CABG)) were obtained by health record audit.

**Results.** The mean age of the sample was 62 years and 30% had ST-elevation myocardial infarction (STEMI). The most common presenting symptom was mid-sternal pain/discomfort of any intensity regardless of ethnic status. Yet, a substantial proportion of patients reported atypical symptoms (33% white, 19% south Asian, 20% Chinese;  $p < 0.006$ ). After adjustment for age, sex, education, current smoking, extent of coronary artery disease, presence of diabetes or chronic kidney disease, and STEMI vs non-STEMI/unstable angina, south Asians were more likely to present with at least moderate intensity mid-sternal pain/discomfort (Adjusted Odds Ratio (AOR) 1.44; 95% Confidence Interval (CI) 1.05-1.98) whereas Chinese were less likely to present with radiating symptoms (AOR 0.53; 95% CI 0.38-0.74) compared with whites. South Asians with atypical pain (relative to those with mid-sternal pain/discomfort) took significantly



1  
2  
3 longer to present to the ER ( $p=0.037$ ), and were less likely to receive PCI ( $p=0.008$ ) or CABG  
4  
5 ( $p=0.041$ ).  
6

7 **Conclusions.** Atypical presentations were associated with greater delays in arrival to the  
8  
9 emergency department and reduced invasive cardiovascular care in south Asians.  
10  
11  
12

### 13 14 **STRENGTHS AND LIMITATIONS OF THIS STUDY**

- 15  
16  
17 • This was a rigorously designed study which included participants who spoke a variety of  
18  
19 languages and used highly systematic and validated translation and data collection  
20  
21 processes.  
22
- 23  
24 • A number of mechanisms were used to obtain a data regarding participants' ACS  
25  
26 symptoms.  
27
- 28  
29 • Only participants who survived their ACS event were included in this study. It is not  
30  
31 possible to know if patients who succumbed to their ACS event or did not seek care had  
32  
33 different symptoms than those who were diagnosed and survived.  
34
- 35  
36 • There was a noteworthy proportion of south Asian and Chinese patients approached to  
37  
38 participate who refused.  
39  
40  
41  
42  
43  
44  
45  
46  
47  
48  
49  
50  
51  
52  
53  
54  
55  
56  
57  
58  
59  
60

## INTRODUCTION

The burden of acute coronary syndrome (ACS) is substantial and it is now the leading cause of death and disability world-wide.<sup>1,2</sup> Life-saving therapies for ACS are dependent on early and timely recognition of symptoms. Atypical presentation of ACS symptoms leads to delays in recognizing symptoms by both patients and healthcare providers, and can result in misdiagnosis, delayed treatment, receipt of fewer evidence-based therapies, and higher in-hospital morbidity and mortality.<sup>3</sup>

The 'classic' ACS presentation, based on the presentation of men of European descent, includes moderate to severe intensity central chest with or without left arm, neck or jaw radiating pain or discomfort.<sup>4,5</sup> This description has been adopted internationally, though some studies suggest that ACS symptoms may differ by ethnicity.<sup>6-11</sup> Although these studies yielded discordant findings, some noted that non-white patients may present with additional symptoms (e.g., gastro-intestinal, dyspnea, nausea)<sup>6-9,11</sup> and south Asians may have more diffuse pain and more frequent back pain<sup>10</sup> than whites. It is difficult to draw robust conclusions from the current evidence given variable methods of data collection, inadequate cross cultural language adaptation, small sample sizes, and insufficient adjustment for other factors (e.g., sex, age, clinical factors) that may influence ACS presentation.

South Asians have a higher incidence of ACS and earlier onset relative to other ethnic groups.<sup>12,13</sup> Though Chinese currently have a lower incidence of acute myocardial infarction (AMI) relative to whites and south Asians,<sup>14,15</sup> cardiovascular events in China are expected to rise by more than 50% by 2030.<sup>16</sup> A rigorous investigation of ACS symptom presentation, time to arrival to the emergency department and clinical care outcomes between these ethnic groups is warranted to ensure appropriate public health messaging and/or inappropriate stereotyping of

1  
2  
3 presenting symptoms. We thus aimed to examine potential ethnic variations in ACS symptoms  
4  
5 using a rigorously cross-culturally adapted symptom questionnaire and visual identifiers in a  
6  
7 multi-centre cohort of white, south Asian, and Chinese patients hospitalized in Canada.  
8  
9

## 10 **METHODS**

### 11 **Study design**

12  
13  
14 We conducted a cross-sectional survey of a cohort of white (i.e., of European descent),  
15  
16 south Asian (i.e., descended from India, Pakistan, Bangladesh, Sri Lanka), and Chinese (i.e.,  
17  
18 descended from China, Hong Kong, Taiwan, Macau) patients hospitalized with physician-  
19  
20 confirmed ACS (unstable angina, ST-elevation (STEMI) or non-STEMI) myocardial  
21  
22 infarction<sup>5</sup>).  
23  
24  
25

### 26 **Setting and sample**

27  
28 Following institutional ethics review at each participating hospital, participants were  
29  
30 recruited consecutively from 12 urban hospitals in 4 Canadian provinces (>90% of Canada's  
31  
32 immigrants reside in urban areas and the majority reside in these provinces<sup>17</sup>) between  
33  
34 September 2010 and December 2015. Inclusion criteria were age  $\geq$  19 years; admission to  
35  
36 hospital with a confirmed diagnosis of ACS (as identified on health record); self-reported  
37  
38 ethnicity for either white (European), south Asian, or Chinese; and speaking English, Punjabi,  
39  
40 Tamil, Urdu, Hindi, or Gujarati, (among the most common languages of Canadian residents from  
41  
42 south Asia),<sup>17</sup> Cantonese, or Mandarin. Nearly 95% of south Asians and all Chinese residing in  
43  
44 Canada would have been able to speak one or more of the languages used in this study.<sup>17</sup>  
45  
46  
47  
48 Exclusion criteria were multiple ethnic origins (i.e., mixed-race) or known cognitive deficits (i.e.,  
49  
50 Alzheimer's Disease, dementia, uncontrolled psychiatric disorder), as identified on the health  
51  
52 record. All participants provided informed consent to participate in this study.  
53  
54  
55  
56  
57  
58  
59  
60

## Patient and Public Involvement

Patients were not involved in the conception, design or interpretation of this study. However, we have a detailed plan to disseminate this information widely to healthcare providers as well as potential patients, through traditional and social media.

## Data collection

Data were collected while participants were in hospital (within the first 5 days), in the patient's preferred language (as listed above) by highly trained like-speaking research assistants. As reported elsewhere,<sup>18</sup> rigorous translation processes were undertaken for study materials.

Questionnaires were developed based on the current literature, and our earlier work.<sup>10,19-21</sup> We, like Teoh et al.,<sup>10</sup> asked participants to mark, on a gender-neutral torso silhouette (pictograph), all the locations of the pain/discomfort that brought them to hospital. Each participant used the same type of pen to 'colour in' the areas. Then, the participant was prompted to identify if he/she experienced other symptoms such as nausea, diaphoresis, dyspnea, dizziness or weakness. Next, they were asked to identify their 'chief' or 'main' symptom, describe its nature by pointing to pictorial identifiers (i.e., stabbing, heavy, shooting, burning, squeezing),<sup>9,21</sup> and finally identify its intensity (Likert-type scale, 0-10 where 0 was no pain). Pain/discomfort severity rated as  $< 5$  was considered mild and  $\geq 5$  or higher was considered moderate to severe pain.

A health record audit was undertaken to collect additional demographic and as well as clinical data, once the participant had been discharged from hospital.

The presence or absence of classic (typical) ACS presentation was defined as having mid-sternal or having mid-sternal with radiating left neck, shoulder or arm pain/discomfort of any or at least moderate intensity. The clinical care outcomes of interest were time to emergency

1  
2  
3 room (ER) presentation and cardiac catheterization; as well as receipt of cardiac catheterization,  
4  
5 percutaneous coronary intervention (PCI) or coronary artery bypass grafting (CABG).  
6

7  
8 There was potential for bias when using this design and data collection method. This was  
9  
10 a self-selected group of patients (i.e., selection bias) who agreed to participate in the study. Also,  
11  
12 the retrospective nature of the design could lead to recall bias given that patients were asked  
13  
14 about their symptoms up to 5 days following hospital admission.  
15

### 16 17 **Statistical analysis**

18  
19 Descriptive statistics and Chi-Square tests were used to identify differences in participant  
20  
21 characteristics, as well as symptoms and location(s) of pain/discomfort between ethnic groups.  
22  
23 Each variable had a 'not entered' category. In binary variables of present/not present, 'not entered'  
24  
25 was assumed to be not present. To analyze presenting symptoms data, a grid was placed over the  
26  
27 original torso silhouette to identify the location(s) of pain/discomfort in a standardized manner.<sup>10</sup>  
28  
29 These data were also presented as proportions of each participant group who identified any  
30  
31 pain/discomfort in the various areas as well as moderate to severe pain/discomfort rated as  $\geq$   
32  
33 5/10 on a Likert-type scale. Crude and adjusted odds ratios with 95% confidence intervals were  
34  
35 examined using logistic regression for south Asians and Chinese relative to whites having any  
36  
37 mid-sternal pain/discomfort or any mid-sternal with radiating left neck, shoulder or arm  
38  
39 pain/discomfort; as well as moderate to severe ( $\geq 5/10$ ) mid-sternal pain/discomfort or mid-  
40  
41 sternal with radiating left neck, shoulder or arm pain/discomfort. Finally, crude and adjusted (as  
42  
43 above) odds ratios with 95% confidence intervals were examined to determine the likelihood of  
44  
45 receiving cardiac catheterization, PCI, and CABG for each ethnic group, based on having any  
46  
47 mid-sternal pain/discomfort or any mid-sternal with radiating left neck, shoulder or arm  
48  
49 pain/discomfort.  
50  
51  
52  
53  
54  
55  
56  
57  
58  
59  
60

Models were adjusted for demographic and clinical characteristics associated with atypical symptoms (age, sex, education, current smoker, extent of coronary artery disease (based on cardiac catheterization), presence of diabetes or chronic kidney disease (CKD; as defined by the Charlson Co-Morbidity Index<sup>22</sup>), and STEMI vs non-STEMI/unstable angina). All data were analyzed using SAS version 9.4.

### Pictographic analysis

We used a heat-mapping technology to portray where participants identified that they pain/discomfort on the torso silhouettes.<sup>10</sup> Given that the numbers of participants varied by ethnic group, the mapping was based on proportion of participants who coloured areas on the torsos versus the absolute number.

## RESULTS

Of 3243 persons screened for eligibility, 1042 did not meet eligibility criteria, and 903 patients declined enrolment in the study. Of the final 1334 patients (58.8% men), 47.2% were white; 36.6% were south Asian and 16.2% were Chinese (see Table 1).

**Table 1.** Patient characteristics by ethnicity

|                         | white<br>(n=630) | south Asian<br>(n=488) | Chinese<br>(n=216) | p-value |
|-------------------------|------------------|------------------------|--------------------|---------|
| Age, mean (SD), years   | 65.9 (13.0)      | 62.2 (12.5)            | 65.1 (12.6)        | <0.0001 |
| Male                    | 276 (43.8%)      | 355 (72.8%)            | 154 (71.3%)        | <0.0001 |
| English Language Survey | 630 (100%)       | 440 (90.2%)            | 161 (74.5%)        | <0.0001 |
| Immigration Status      |                  |                        |                    | <0.0001 |
| Canadian-born           | 455 (72.1%)      | 11 (2.3%)              | 10 (4.6%)          |         |
| Immigrant < 20 yrs      | 15 (2.4%)        | 189 (38.8%)            | 81 (36.6%)         |         |

|                                   |             |             |             |         |
|-----------------------------------|-------------|-------------|-------------|---------|
| Immigrant $\geq$ 20 yrs           | 160 (25.4%) | 288 (59.0%) | 123 (56.9%) |         |
| None documented                   | 1 (0.25)    | 0           | 2 (0.9%)    |         |
| Marital Status                    |             |             |             | <0.0001 |
| Married/Common law                | 362 (57.4%) | 383 (78.5%) | 174 (80.6%) |         |
| Other                             | 269 (42.7%) | 105 (21.6%) | 42 (19.5%)  |         |
| Highest level education           |             |             |             | 0.0001  |
| None                              | 8 (1.3%)    | 31 (6.4%)   | 7 (3.2%)    |         |
| < High School                     | 94 (14.9%)  | 83 (17.0%)  | 41 (19.0%)  |         |
| $\geq$ High School                | 529 (83.9%) | 374 (76.7%) | 168 (77.8%) |         |
| None documented                   | 0           | 0           | 0           |         |
| Current smoker                    | 123 (19.5%) | 53 (10.9%)  | 27 (12.5%)  | 0.0002  |
| Extent of coronary artery disease |             |             |             | <0.0001 |
| Normal/<50% disease               | 92 (14.6%)  | 50 (10.3%)  | 36 (16.7%)  |         |
| 1-2 vessel disease                | 148 (23.5%) | 91 (18.7%)  | 33 (15.3%)  |         |
| 3 vessel disease/LAD              | 272 (43.2%) | 293 (60.0%) | 109 (50.5%) |         |
| Left main                         | 11 (1.8%)   | 4 (0.8%)    | 10 (4.6%)   |         |
| Not entered/missing               | 107 (17.0%) | 50 (10.3%)  | 28 (13.0%)  |         |
| Diabetes                          | 193 (30.6%) | 224 (45.9%) | 64 (29.6%)  | <0.0001 |
| Chronic renal disease             | 74 (11.7%)  | 45 (9.2%)   | 18 (8.3%)   | 0.229   |
| Acute Coronary Syndrome           |             |             |             | 0.187   |
| Unstable Angina                   | 205 (32.5%) | 132 (27.1%) | 61 (28.2%)  |         |
| Non-STEMI*                        | 228 (36.2%) | 208 (42.6%) | 83 (38.4%)  |         |
| STEMI                             | 188 (29.8%) | 145 (29.7%) | 68 (31.5%)  |         |

|             |          |          |          |  |
|-------------|----------|----------|----------|--|
| Unspecified | 9 (1.5%) | 3 (0.6%) | 4 (1.8%) |  |
|-------------|----------|----------|----------|--|

\*STEMI=ST elevation myocardial infarction

### Baseline characteristics

Over 72% of whites were Canadian-born whereas the majority of south Asians and Chinese had immigrated to Canada  $\geq 20$  years earlier. Among these three ethnic groups, whites were most likely to be a current smoker and have 1-2 vessel disease; south Asians were most likely to have 3-vessel disease and diabetes; and the greatest proportion of each patient group (36.2% whites, 42.6% south Asian, 38.4% Chinese) were admitted with non-STEMI.

### ACS symptom presentation

The most common presenting symptom **across** ethnic groups was mid-sternal pain/discomfort of any intensity (89.3%) followed by left shoulder pain/discomfort (46.6%) (Table 2). Most of the pain or discomfort was rated as moderate to severe ( $\geq 5/10$ ) across ethnicities. More than 78% of all patients reported the classic presentation of at least moderate intensity mid-sternal pain/discomfort, and more than 58% of all patients reported moderate to severe intensity mid-sternal chest with any of radiating left neck, shoulder or arm pain/discomfort. In these unadjusted analyses, whites were less likely to report having the classic presentation of at least moderate intensity mid-sternal pain/discomfort while the Chinese were less likely to report having at least moderate intensity mid-sternal pain/discomfort with radiation to left neck, shoulder or arm. Extent of coronary artery disease was not associated with having classic symptoms in whites ( $p=0.973$ ), south Asians ( $p=0.562$ ), or Chinese ( $p=0.304$ ) patients.

The majority of patients described their pain or discomfort as pressure, squeezing or burning (81.3% whites, 74.8% south Asians, 81.0% Chinese), although south Asians reported significantly more stabbing pain than their counterparts. Other symptoms were also prevalent



among all ethnic groups: shortness of breath (62.4%), diaphoresis (49.8%), dizziness (49.3%), and nausea/vomiting (33.1%). There were significant differences between groups in reporting these symptoms with whites reporting more dizziness, and nausea or vomiting.

**Table 2.** Reported ACS symptoms by ethnicity

|                                                                                                        | white<br>(n=630) | south Asian<br>(n=488) | Chinese<br>(n=216) | p-value |
|--------------------------------------------------------------------------------------------------------|------------------|------------------------|--------------------|---------|
| <b>Pain/Discomfort Location</b>                                                                        |                  |                        |                    |         |
| Mid-Sternal                                                                                            | 559 (88.7%)      | 438 (89.9%)            | 194 (89.8%)        | 0.828   |
| Left Shoulder                                                                                          | 310 (49.1%)      | 239 (49.0%)            | 72 (33.3%)         | 0.0006  |
| Left Arm                                                                                               | 206 (32.7%)      | 140 (28.7%)            | 22 (10.2%)         | <0.0001 |
| Left Jaw                                                                                               | 122 (19.3%)      | 67 (13.7%)             | 21 (9.7%)          | 0.003   |
| Left Neck                                                                                              | 114 (18.1%)      | 69 (14.1%)             | 19 (8.8%)          | 0.0006  |
| Mid-Sternal, with Radiating Left Neck, Shoulder or Arm Pain/Discomfort                                 | 435 (69.0%)      | 316 (63.8%)            | 123 (57.0%)        | <0.0001 |
| Mid-sternal Pain/Discomfort with Intensity $\otimes \geq 5$                                            | 482 (76.5%)      | 394 (80.7%)            | 172 (79.6%)        | 0.0435  |
| Mid-Sternal, with Radiating Left Neck, Shoulder or Arm Pain/Discomfort with Intensity $\otimes \geq 5$ | 385 (61.6%)      | 285 (58.4%)            | 111 (51.4%)        | <0.0001 |
| <b>Nature of Pain/Discomfort</b>                                                                       |                  |                        |                    |         |
| Pressure                                                                                               | 312 (49.5%)      | 174 (35.7%)            | 93 (43.1%)         | <0.0001 |

|                     |             |             |             |       |
|---------------------|-------------|-------------|-------------|-------|
| Squeezing           | 118 (18.7%) | 120 (24.6%) | 57 (26.4%)  | 0.016 |
| Burning             | 82 (13.0%)  | 71 (14.6%)  | 25 (11.6%)  | 0.533 |
| Stabbing            | 48 (7.6%)   | 68 (14.0%)  | 17 (7.9%)   | 0.001 |
| Shooting/Moving     | 30 (4.8%)   | 39 (8.0%)   | 11 (5.1%)   | 0.065 |
| None                | 40 (6.4%)   | 16 (3.3%)   | 13 (6.0%)   | 0.059 |
| Not documented      | 0           | 0           | 0           | ----  |
| Other Symptoms      |             |             |             |       |
| Shortness of breath | 386 (61.2%) | 303 (62.1%) | 132 (61.1%) | 0.952 |
| Diaphoresis         | 313 (49.7%) | 239 (49.0%) | 103 (47.7%) | 0.877 |
| Dizziness           | 329 (52.2%) | 221 (45.3%) | 99 (45.8%)  | 0.047 |
| Nausea or vomiting  | 235 (37.3%) | 145 (29.7%) | 56 (25.9%)  | 0.002 |

The pictographic analysis of the torsos (Figure 1) shows that the profiles were very similar for whites and south Asians, whereas the Chinese tended to report more central as well as less back or left arm pain/discomfort.

In the analysis stratified by ethnic group (Table 2), ethnicity was not significantly associated with reporting mid-sternal pain/discomfort of any intensity. However, in adjusted (age and sex; age sex, education, current smoker, extent of coronary artery disease, diabetes, CKD, and STEMI versus non-STEMI/unstable angina) models (Table 3), south Asians were significantly more likely to report having mid-sternal pain/discomfort of moderate to severe intensity. The Chinese participants were less likely to report having radiating ACS symptoms (i.e., mid-sternal, with left neck, shoulder or arm pain or discomfort) of any as well as moderate to severe intensity, relative to whites in crude and adjusted models.

**Table 3. Crude and adjusted odds ratios for ACS symptom presentation**

| Ethnic Group                                                                           | Any Intensity     |                      |                      | Moderate to Severe Intensity |                      |                      |
|----------------------------------------------------------------------------------------|-------------------|----------------------|----------------------|------------------------------|----------------------|----------------------|
|                                                                                        | Crude OR (95%CI)  | Adjusted* OR (95%CI) | Adjusted† OR (95%CI) | Crude OR (95%CI)             | Adjusted* OR (95%CI) | Adjusted† OR (95%CI) |
| <b>At least moderate intensity mid-sternal pain/discomfort</b>                         |                   |                      |                      |                              |                      |                      |
| white                                                                                  | 1.0               | 1.0                  | 1.0                  | 1.0                          | 1.0                  | 1.0                  |
| south Asian                                                                            | 1.11 (0.76, 1.63) | 1.04 (0.70, 1.56)    | 1.04 (0.68, 1.57)    | 1.29 (0.96, 1.72)            | 1.44 (1.06, 1.96)    | 1.43 (1.04, 1.97)    |
| Chinese                                                                                | 1.12 (0.68, 1.86) | 1.12 (0.67, 1.89)    | 1.18 (0.70, 2.00)    | 1.20 (0.82, 1.75)            | 1.40 (0.95, 2.07)    | 1.41 (0.95, 2.09)    |
| <b>At least moderate mid-sternal, with left neck, shoulder, or arm pain/discomfort</b> |                   |                      |                      |                              |                      |                      |
| white                                                                                  | 1.0               | 1.0                  | 1.0                  | 1.0                          | 1.0                  | 1.0                  |
| south Asian                                                                            | 0.86 (0.68, 1.10) | 0.83 (0.64, 1.06)    | 0.81 (0.62, 1.05)    | 0.94 (0.74, 1.19)            | 0.95 (0.74, 1.21)    | 0.92 (0.71, 1.75)    |
| Chinese                                                                                | 0.44 (0.32, 0.61) | 0.45 (0.32, 0.62)    | 0.46 (0.33, 0.63)    | 0.50 (0.36, 0.69)            | 0.53 (0.38, 0.74)    | 0.53 (0.38, 0.75)    |

\*adjusted for age and sex; †adjusted for age, sex, education, current smoker, extent of coronary artery disease (no disease vs low risk or high risk), diabetes, CKD, and STEMI vs non-STEMI/unstable angina

### Clinical care outcomes

The mean time to emergency room presentation, for those who had a distinct time of symptom onset, was 5.53 to 7.41 hours (Table 4). South Asians with atypical symptoms had significantly longer delays in arrival to the emergency department than those who had any typical symptoms. The mean time to receipt of cardiac catheterization following emergency room presentation was 3.00-3.93 hours. Whites with atypical symptoms had significantly longer delays in time to receipt of cardiac catheterization than those with typical symptoms. South Asian participants who had any typical mid-sternal pain/discomfort were more likely to receive PCI but less likely to receive CABG than those with atypical symptoms. Table 4 also shows that south Asian participants who had any typical mid-sternal with left neck, shoulder, or arm pain/discomfort were more likely to receive PCI than those who had atypical symptoms.

**Table 4. Clinical care outcomes by symptoms and ethnicity**

|  | white           |                  |         | south Asian     |                 |         | Chinese         |                 |         |
|--|-----------------|------------------|---------|-----------------|-----------------|---------|-----------------|-----------------|---------|
|  | Typical (n=482) | Atypical (n=148) | p-value | Typical (n=394) | Atypical (n=94) | p-value | Typical (n=172) | Atypical (n=44) | p-value |
|  |                 |                  |         |                 |                 |         |                 |                 |         |

|                                                                          |             |             |       |             |             |       |             |             |       |
|--------------------------------------------------------------------------|-------------|-------------|-------|-------------|-------------|-------|-------------|-------------|-------|
| <b>Any mid-sternal pain/discomfort</b>                                   | n=451       | n=116       |       | n=359       | n=71        |       | n=144       | n=32        |       |
| Time to ER presentation (hours; if distinct time of onset) Mean (SD)     | 6.43 (5.77) | 6.11 (5.53) | 0.591 | 5.69 (5.35) | 7.17 (5.94) | 0.037 | 5.92 (5.49) | 7.41 (6.10) | 0.176 |
| Median (IQR)                                                             | 3.0 (6.5)   | 3.0 (6.0)   | 0.872 | 3.0 (6.0)   | 5.0 (6.5)   | 0.127 | 3.0 (6.0)   | 6.0 (6.5)   | 0.318 |
| Time to CATH* (hours) Mean (SD)                                          | 3.35 (1.76) | 3.93 (1.57) | 0.001 | 3.10 (1.80) | 3.10 (1.72) | 0.975 | 3.09 (1.82) | 3.58 (1.72) | 0.134 |
| Median (IQR)                                                             | 4.0 (2.0)   | 5.0 (1.0)   | 0.002 | 3.0 (2.0)   | 2.0 (2.0)   | 0.862 | 3.0 (2.0)   | 5.0 (1.5)   | 0.109 |
|                                                                          | n (%)       | n (%)       |       | n (%)       | n (%)       |       | N (%)       | n (%)       |       |
| CATH                                                                     | 402 (83.4%) | 124 (83.8%) | 0.913 | 359 (91.1%) | 81 (86.2%)  | 0.148 | 151 (87.8%) | 38 (86.4%)  | 0.826 |
| PCI <sup>†</sup>                                                         | 228 (47.3%) | 60 (40.5%)  | 0.149 | 211 (53.6%) | 36 (38.3%)  | 0.008 | 81 (47.1%)  | 19 (43.2%)  | 0.777 |
| CABG <sup>§</sup>                                                        | 44 (9.1%)   | 17 (11.5%)  | 0.396 | 38 (9.6%)   | 16 (17.0%)  | 0.041 | 13 (7.6%)   | 5 (11.4%)   | 0.636 |
| <b>Any mid-sternal, with left neck, shoulder, or arm pain/discomfort</b> | n=330       | n=237       |       | n=234       | n=196       |       | n=68        | n=108       |       |
| Time to ER presentation (hours; if distinct time of onset) Mean (SD)     | 6.41 (5.82) | 6.31 (5.57) | 0.836 | 5.53 (5.35) | 6.42 (5.60) | 0.092 | 6.0 (5.65)  | 6.31 (5.62) | 0.726 |
| Median (IQR)                                                             | 3.0 (6.5)   | 3.0 (3.0)   | 0.926 | 2.0 (6.0)   | 3.0 (6.5)   | 0.037 | 3.0 (6.0)   | 3.0 (6.0)   | 0.649 |
| Time to CATH* (hours) Mean (SD)                                          | 3.40 (1.76) | 3.61 (1.68) | 0.154 | 3.0 (1.77)  | 3.2 (1.79)  | 0.241 | 3.28 (1.81) | 3.14 (1.81) | 0.615 |
| Median (IQR)                                                             | 4.0 (2.0)   | 5.0 (1.5)   | 0.192 | 3.0 (2.0)   | 3.0 (2.0)   | 0.202 | 4.0 (2.0)   | 3.0 (2.0)   | 0.635 |
|                                                                          | n (%)       | n (%)       |       | n (%)       | n (%)       |       | n (%)       | n (%)       |       |
| CATH                                                                     | 306 (86.0%) | 220 (80.3%) | 0.058 | 235 (91.1%) | 205 (89.1%) | 0.469 | 65 (82.3%)  | 124 (90.5%) | 0.126 |
| PCI                                                                      | 172 (48.3%) | 116 (42.3%) | 0.135 | 143 (55.4%) | 104 (45.2%) | 0.024 | 41 (51.9%)  | 59 (43.1%)  | 0.361 |
| CABG                                                                     | 33 (9.3%)   | 28 (10.2%)  | 0.690 | 30 (11.6%)  | 24 (10.4%)  | 0.675 | 4 (5.1%)    | 14 (10.2%)  | 0.307 |

\*CATH=catheterization; <sup>†</sup>PCI=percutaneous coronary intervention; <sup>§</sup>CABG=coronary artery bypass graft surgery

However, after adjustment, south Asians with atypical symptoms were least likely to receive PCI than those with typical symptoms (Table 5).

**Table 5.** Crude and adjusted odds ratios for clinical care outcomes

| Atypical vs typical                    | Crude OR (95% CI) | Adjusted <sup>†</sup> OR (95% CI) |
|----------------------------------------|-------------------|-----------------------------------|
| <b>Any mid-sternal pain/discomfort</b> |                   |                                   |
| CATH <sup>†</sup>                      |                   |                                   |
| white                                  | 1.03 (0.62, 1.69) | 1.15 (0.53, 2.49)                 |
| south Asian                            | 0.61 (0.31, 1.20) | 0.66 (0.22, 1.98)                 |
| Chinese                                | 0.89 (0.33, 2.35) | 2.77 (0.64, 11.90)                |
| PCI <sup>§</sup>                       |                   |                                   |
| white                                  | 0.76 (0.52, 1.10) | 0.73 (0.45, 1.19)                 |
| south Asian                            | 0.54 (0.34, 0.85) | 0.57 (0.32, 1.00)                 |

|                                                                          |             |                   |                    |
|--------------------------------------------------------------------------|-------------|-------------------|--------------------|
|                                                                          | Chinese     | 0.87 (0.45, 1.69) | 1.10 (0.45, 2.68)  |
| <b>CABG**</b>                                                            |             |                   |                    |
|                                                                          | white       | 1.29 (0.71, 2.34) | 1.59 (0.81, 3.09)  |
|                                                                          | south Asian | 1.92 (1.02, 3.62) | 1.90 (0.96, 3.77)  |
|                                                                          | Chinese     | 1.63 (0.56, 4.73) | 1.76 (0.53, 5.80)  |
| <b>Any mid-sternal, with left neck, shoulder, or arm pain/discomfort</b> |             |                   |                    |
| <b>CATH</b>                                                              |             |                   |                    |
|                                                                          | white       | 0.67 (0.44, 1.02) | 0.90 (0.47, 1.73)  |
|                                                                          | south Asian | 0.80 (0.44, 1.46) | 1.37 (0.55, 3.41)  |
|                                                                          | Chinese     | 2.08 (0.92, 4.68) | 4.94 (1.41, 17.31) |
| <b>PCI</b>                                                               |             |                   |                    |
|                                                                          | white       | 0.79 (0.57, 1.08) | 0.84 (0.56, 1.26)  |
|                                                                          | south Asian | 0.66 (0.46, 0.95) | 0.74 (0.47, 1.18)  |
|                                                                          | Chinese     | 0.69 (0.40, 1.21) | 0.49 (0.23, 1.05)  |
| <b>CABG</b>                                                              |             |                   |                    |
|                                                                          | white       | 1.11 (0.66, 1.89) | 1.24 (0.69, 2.21)  |
|                                                                          | south Asian | 0.89 (0.50, 1.56) | 0.92 (0.50, 1.70)  |
|                                                                          | Chinese     | 1.82 (0.63, 5.31) | 2.10 (0.65, 6.85)  |

\* adjusted for age and sex; † adjusted for age, sex, education, current smoker, extent of coronary artery disease (no disease vs low risk or high risk), diabetes, CKD, and STEMI vs non-STEMI/unstable angina; ‡ CATH= catheterization; § PCI=percutaneous coronary intervention; \*\* CABG=coronary artery bypass graft surgery

## DISCUSSION

The classic (typical) presentation of moderate to severe intensity mid-sternal chest pain or discomfort was the most common presenting ACS symptom across ethnic groups. Yet, a substantial proportion of patients, up to one third, in each group studied had non-classic (atypical) ACS presentations. Differences in ACS symptom presentation among whites, south Asians, and Chinese patients were statistically and clinically significant, as south Asians were more likely to present with classic ACS symptoms and Chinese were less likely to present with radiating symptoms in all models relative to whites. Our study extends the findings from previous work by employing rigorous cross cultural and language adaptation of study questionnaires, and including visual diagrams across multiple centers.

Findings from other studies have some similar conclusions. Like the south Asian and Chinese participants in our study, Blacks have been reported to have a similar prevalence of

1  
2  
3 chest pain relative to whites,<sup>6-9</sup> while other studies suggest that non-white patients with ACS are  
4 more likely to have chest pain than whites. A study from a single hospital in the United Kingdom  
5 reported south Asians are more frequently to have 'classic chest pain with radiation' than whites  
6 (90 vs. 82%).<sup>10</sup> A study of 390 ACS patients residing in the Asia-Pacific rim revealed patients  
7 from India, China and Korea were significantly more likely to report typical pain than their white  
8 counterparts.<sup>11</sup> A small study of whites, Blacks (US-residents), and Koreans (Korea-residents)  
9 revealed Koreans reported significantly more frequent and greater radiation of chest pain.<sup>8</sup> Yet,  
10 our earlier study from a single health region, revealed that south Asian and Chinese AMI patients  
11 were less likely to report classic symptom presentation.<sup>19</sup> These inconsistencies may be  
12 explained by the controlled analyses we used, and the lack of cross cultural (and language)  
13 adaptation in other studies.  
14  
15  
16  
17  
18  
19  
20  
21  
22  
23  
24  
25  
26  
27

28 We found significant differences among ethnic groups in the intensity and nature of the  
29 pain/discomfort as well as the presence of additional symptoms. Ethnicity and culture may  
30 influence patients identifying, recognizing, and acknowledging urgent symptoms as such, as well  
31 as making the decision to seek care. Though not consistent, study findings suggest that people  
32 who represent ethnic minorities (who are not residing in their country of origin) have greater  
33 pain sensitivity in both clinical and experimental conditions relative to the ethnic majority (e.g.,  
34 whites). Though most of this research has been undertaken in African Americans and Hispanics  
35 relative to whites,<sup>23</sup> what little research that has focused on south Asians or Chinese suggests that  
36 both groups may report less pain tolerance relative to whites.<sup>24,25</sup> Single centre studies have  
37 revealed that south Asians and Chinese with AMI tended to report atypical symptoms and did  
38 not recognize or accept their symptoms as 'urgent'.<sup>19,26</sup> Research findings suggest that  
39 expression of symptoms, and language and semantic differences of symptom descriptors may  
40  
41  
42  
43  
44  
45  
46  
47  
48  
49  
50  
51  
52  
53  
54  
55  
56  
57  
58  
59  
60

1  
2  
3 also account for discrepancies in reporting symptoms. Given that pain/discomfort are subjective  
4 experiences, how they are portrayed are culturally bound.<sup>23-30</sup> For example, the Worcester Heart  
5 Attack Study revealed that south Asian participants were significantly less accepting of overtly  
6 expressing pain,<sup>21</sup> and both south Asians and Chinese are viewed as more stoic in their  
7 presentations.<sup>29</sup>

8  
9  
10 We identified little overall ethnic variation in time to emergency room presentation,  
11 though south Asians who had atypical symptoms were more likely to have a longer time to  
12 presentation to the emergency room (mean of 1.48 hours longer) relative to those who had  
13 typical symptoms. In a study of 440,398 registry patients, Ting et al.<sup>31</sup> demonstrated that delays  
14 from symptom onset to emergency room presentation were associated with reduced likelihoods  
15 of receiving any reperfusion therapy in the general population. Authors of other American  
16 studies have demonstrated ethnic (e.g., African Americans, Hispanics, Pacific Islanders)  
17 differences relative to whites in longer time to emergency room presentation and reduced access  
18 to treatment (reperfusion therapies) for ACS events.<sup>30-33</sup>

19  
20  
21 Overall, and after adjustment, south Asians with atypical symptoms were least likely of  
22 the ethnic groups to receive PCI than those with typical symptoms. The reasons for this  
23 difference are not clear. It is possible that south Asians with atypical presentations arrive too late  
24 for emergent coronary revascularization; there are biases from health care providers; or this  
25 population may be more likely to refuse invasive cardiovascular procedures.

### 26 **Study limitations**

27  
28  
29 There were some limitations to this study. First, we studied participants who survived  
30 their ACS event. It is not possible to know if patients who succumbed to their ACS event or did  
31 not seek care had different symptoms than those who were diagnosed and survived. Second, we

1  
2  
3 studied only those who agreed to participate. The proportion of south Asian and Chinese patients  
4  
5 approached to participate and who refused was noteworthy. Third, we studied only patients in  
6  
7 Canada who were admitted to selected hospitals. Finally, the cross sectional design renders only  
8  
9 observations and no basis for attributing causation. We undertook the following to balance these  
10  
11 limitations: we employed a rigorous approach to comparing symptom presentation between  
12  
13 cultural groups in this large cross-sectional study; we included participants who spoke a variety  
14  
15 of languages, using highly systematic and validated translation and data collection processes; and  
16  
17 had a large sample size.  
18  
19  
20

## 21 **Conclusions**

22  
23 A substantial proportion of white, south Asian and Chinese patients with ACS do not  
24  
25 report classic ACS symptoms. Differences in ACS symptoms presentation among whites, south  
26  
27 Asians, and Chinese patients are significant with south Asians being more likely to report mid-  
28  
29 sternal pain/discomfort and Chinese being less likely to report radiating pain/discomfort, relative  
30  
31 to whites. On the whole, the mean time to emergency room presentation was unacceptably long  
32  
33 for each ethnic group and especially so for south Asians. These delays can reduce the  
34  
35 opportunity to receive evidence-based reperfusion therapies. From a public health perspective,  
36  
37 we need to include non-chest pain symptoms for screening and public awareness campaigns for  
38  
39 ACS among south Asian, Chinese and white persons.  
40  
41  
42  
43  
44  
45  
46  
47  
48  
49  
50  
51  
52  
53  
54  
55  
56  
57  
58  
59  
60



## ACKNOWLEDGEMENTS

The study team gratefully acknowledges the contributions of Pamela LeBlanc, for managing the study, as well as Elizabeth Lavigne and Jo-Ann Sawatzky for leading two of the study sites. Data management services were provided by EPICORE Centre, University of Alberta.

## COMPETING INTERESTS

RT reports grants from Merck Canada, personal fees from Merck Canada, outside the submitted work.

## SOURCES OF FUNDING

This work was supported by the Canadian Institutes of Health Research and the Guru Nanak Dev Ji DIL Research Chair.

KKS was supported by Alberta Innovates Health Solutions (Health Scholar) and currently by the DIL Walk Foundation.

HQ was supported by Alberta Innovates Health Solutions (Health Scholar)

MK was supported by a Career Investigator Award from the Heart and Stroke Foundation.

Ontario Provincial Office

NK was supported by a Michael Smith Foundation for Health Research Career Scientist award.

## AUTHORS' CONTRIBUTION

All authors have met the ICMJE recommendations regarding authorship.

KKS, HQ and NK conceived the study.

KKS, HQ, RT, and NK made substantial contributions to the design of the work.

MK, LA, SB, and NK made substantial contributions to the acquisition of data.

KKS, HQ, RT, DS, and NK made substantial contributions to the analysis

1  
2  
3 KKS, HQ, MK, RT, LA, SB, DS, and NK made substantial contributions to the interpretation of  
4  
5 the data  
6

7  
8 KKS, HQ, MK, RT, LA, SB, DS, and NK made substantial contributions to drafting the work or  
9  
10 revising it critically for important intellectual content, and made final approval of the version to  
11  
12 be published.  
13

14  
15 KKS, HQ, MK, RT, LA, SB, DS, and NK agree to be accountable for all aspects of the work in  
16  
17 ensuring that questions related to the accuracy or integrity of any part of the work are  
18  
19 appropriately investigated and resolved.  
20

## 21 **DATA SHARING STATEMENT**

22  
23  
24 Data are housed at the University of Calgary and are not available at this time.  
25  
26  
27  
28  
29  
30  
31  
32  
33  
34  
35  
36  
37  
38  
39  
40  
41  
42  
43  
44  
45  
46  
47  
48  
49  
50  
51  
52  
53  
54  
55  
56  
57  
58  
59  
60

**REFERENCES**

1. World Health Organization. Media Centre – Cardiovascular Diseases (CVDs). Available at: [www.who.int/mediacentre/factsheets/fs317/en/](http://www.who.int/mediacentre/factsheets/fs317/en/). Accessed on February 12, 2016.
2. Vedanthan R, Seligman B, Fuster V. Global perspective on acute coronary syndrome. A burden on the young and poor. *Circ Res* 2014;114(12):1959-75.
3. El-Menyar A, Zubaid M, Sulaiman K, *et al.*, for the Gulf Registry of Acute Coronary Events (Gulf RACE) Investigators. Atypical presentation of acute coronary syndrome: A significant independent predictor of in-hospital mortality. *J Cardiol* 2011;57(2):165-71.
4. Anderson J, Adams C, Antman E, *et al.* ACC/AHA 2007 guidelines for the management of patients with unstable angina/non-ST-elevation myocardial infarction: A report of the American College of Cardiology/American Heart Association Task Force on practice guidelines. *J Am Coll Cardiol* 2007;50:e1-157.
5. Thérroux P, Fuster V. Acute coronary syndromes. Unstable angina and non-Q-wave myocardial infarction. *Circ* 1998;97(12):1195-206.
6. Lee H, Bahler R, Chung C, Alonzo A, Zeller RA. Prehospital delay with myocardial infarction: the interactive effect of clinical symptoms and race. *App Nurs Res* 2000; 13(3):125-33.
7. Klinger D, Green-Weir R, Nerenz D, *et al.* Perceptions of chest pain differ by race. *Am Heart J* 2002;144(1):51-9.
8. Lee H, Bahler R, Park OJ, Kim CJ, Lee HY, Kim YJ. Typical and atypical symptoms of myocardial infarction among African Americans, Whites, and Koreans. *Crit Care Nurs Clin N Amer* 2001;13(4):531-9.

- 1  
2  
3 9. Hravnak M, Whittle J, Kelley ME, et al. Symptom expression in coronary heart disease and  
4 revascularization recommendations for Black and White patients. *Am J Public Health*  
5  
6 2007;97(9):1701-8.  
7  
8
- 9  
10 10. Teoh M, Lalondrelle S, Roughton M, Grocott-Mason R, Dubrey SW. Acute coronary  
11 syndromes and their presentation in Asian and Caucasian patients in Britain. *Heart* 2007;  
12  
13 93(2):183-8.  
14  
15
- 16  
17 11. Greenslade JH, Cullen L, Parsonage W, et al. Examining the signs and symptoms  
18 experienced by individuals with suspected acute coronary syndrome in the Asia-Pacific  
19 region: A prospective observational study. *Ann Emerg Med* 2012;60(6):777-85.  
20  
21  
22
- 23  
24 12. Rana A, de Souza RJ, Kandasamy S, Lear SA, Anand SS. Cardiovascular risk among South  
25 Asians living in Canada: A systematic review and meta-analysis. *CMAJ Open* 2014;2(3):  
26  
27 E183-91.  
28  
29
- 30  
31 13. Khan NA, Grubisic M, Hemmelgarn B, Humphries K, King KM, Quan H. Outcomes after  
32 acute myocardial infarction in South Asian, Chinese, and White patients. *Circ* 2010;  
33  
34 122(16):1570-7.  
35  
36
- 37  
38 14. Zaman MJS, Philipson P, Chen R, et al. South Asians and coronary disease: Is there a  
39 discordance between effects on incidence and prognosis? *Heart* 2013;99(10):729-36.  
40  
41
- 42  
43 15. Jin K, Ding D, Gullick J, Koo F, Neubeck L. A Chinese immigrant paradox? Low coronary  
44 heart disease incidence but higher short-term mortality in Western-dwelling Chinese  
45 immigrants: A systematic review and meta-analysis. *J Am Heart Assoc* 2015;4:e002568  
46  
47  
48
- 49  
50 16. Moran A, Gu D, Zhao D, et al. Future cardiovascular disease in China: Markov model and  
51 risk factor scenario projections from the coronary heart disease policy model-China. *Circ*  
52  
53  
54  
55  
56  
57  
58  
59  
60  
*Cardiovasc Qual Outcomes* 2010;3(3):2432-52.

17. Statistics Canada. Immigration and Ethnocultural Diversity in Canada. National Household Survey, 2011. Catalogue no. 99-010-X2011001. Available at: [www12.statcan.gc.ca/nhs-enm/2011/as-sa/99-010-x/99-010-x2011001-eng.pdf](http://www12.statcan.gc.ca/nhs-enm/2011/as-sa/99-010-x/99-010-x2011001-eng.pdf). Accessed March 8, 2016.
18. King KM, Khan N, LeBlanc P, Quan H. Establishing translational and conceptual equivalence of survey questionnaires for a multi-ethnic, multi-language study. *J Adv Nurs* 2011;67(10):2267-74.
19. King KM, Khan N, Quan H. Ethnic variation in acute myocardial infarction presentation and access to care. *Am J Cardiol* 2009;103(10):1368-73.
20. King-Shier KM, Singh S, LeBlanc P, *et al*. The influence of ethnicity and gender on navigating an acute coronary syndrome event. *Euro J Cardiovasc Nurs* 2015;14(3):240-47.
21. Milner KA, Vaccarino V, Arnold AL, Funk M, Goldbert RJ. Gender and age differences in chief complaints of acute myocardial infarction (Worcester Heart Attack Study). *Am J Cardiol* 2004;93(5):606-8.
22. Sundararajana V, Henderson T, Perrya C, *et al*. New ICD-10 version of the Charlson Comorbidity Index predicted in-hospital mortality. *J Clin Epidemiol* 2004;57:1288-94.
23. Rahim-Williams B, Riley JL, Williams AKK, Fillingim RB. A quantitative review of ethnic group differences in experimental pain response: Do biology, psychology and culture matter? *Pain Med* 2012;13(4):522-40.
24. Campbell CM, Edwards RR. Ethnic differences in pain and pain management. *Pain Manag* 2012;2(3):219-30.
25. Rowell LN, Mechlin B, Ji E, Addamo M, Girdler SS. Asians differ from non-Hispanic whites in experimental pain sensitivity. *Euro J Pain* 2011;15(17):764-71.

- 1  
2  
3  
4  
5  
6  
7  
8  
9  
10  
11  
12  
13  
14  
15  
16  
17  
18  
19  
20  
21  
22  
23  
24  
25  
26  
27  
28  
29  
30  
31  
32  
33  
34  
35  
36  
37  
38  
39  
40  
41  
42  
43  
44  
45  
46  
47  
48  
49  
50  
51  
52  
53  
54  
55  
56  
57  
58  
59  
60
26. Chan C-W, Lopez V, Chung JWY. Chest pain description and recognition among Chinese people with coronary problems. *World Crit Care Nurs* 2008;6(4):66-8.
  27. Surgeon General. Mental Health: Culture, race and ethnicity: A supplement to mental health: A report of the Surgeon General. Substance Abuse and Mental Health Services Administration. Available at: [www.ncbi.nlm.nih.gov/books/NBK44249/](http://www.ncbi.nlm.nih.gov/books/NBK44249/). Accessed on April 7, 2016.
  28. Kleinman A. Depression, somatization and the "new cross-cultural psychiatry." *Soc Sci Med* 1977;11(1):3-9.
  29. Galanti G-A. Caring for Patients from Different Cultures. 5<sup>th</sup> ed. Pittsburgh, PA: University of Pennsylvania Press 2015.
  30. Nayak S, Shiflett SC, Eshun S, Levine FM. Culture and gender effects in pain beliefs and the prediction of pain tolerance. *Cross-Cultur Res* 2000;34(2):135-51.
  31. Ting HH, Bradley EH, Wang Y, *et al.* Delay in presentation and reperfusion therapy in ST-elevation myocardial infarction. *Am J Med* 2008;121(4):316–23.
  32. Bradley EH, Herrin J, Wang Y, *et al.* Racial and ethnic differences in time to acute reperfusion therapy for patients hospitalized with myocardial infarction. *JAMA* 2004;292(13):1563-72.
  33. Vaccarino V, Rathore SS, Wenger NK, *et al.*, for the National Registry of Myocardial Infarction Investigators. Sex and racial differences in the management of acute myocardial infarction, 1994 through 2002. *N Engl J Med* 2005;353:671-82.

1  
2  
3 **Figure 1. Pictographic for Each Ethnic Group**  
4

5 The colour gradient (white/purple to red) indicates no/few participants to most (>65%) of  
6 participants identified pain/discomfort in that location.  
7  
8  
9  
10  
11  
12  
13  
14  
15  
16  
17  
18  
19  
20  
21  
22  
23  
24  
25  
26  
27  
28  
29  
30  
31  
32  
33  
34  
35  
36  
37  
38  
39  
40  
41  
42  
43  
44  
45  
46  
47  
48  
49  
50  
51  
52  
53  
54  
55  
56  
57  
58  
59  
60

For peer review only

1  
2  
3  
4  
5  
6  
7  
8  
9  
10  
11  
12  
13  
14  
15  
16  
17  
18  
19  
20  
21  
22  
23  
24  
25  
26  
27  
28  
29  
30  
31  
32  
33  
34  
35  
36  
37  
38  
39  
40  
41  
42  
43  
44  
45  
46  
47  
48  
49  
50  
51  
52  
53  
54  
55  
56  
57  
58  
59  
60

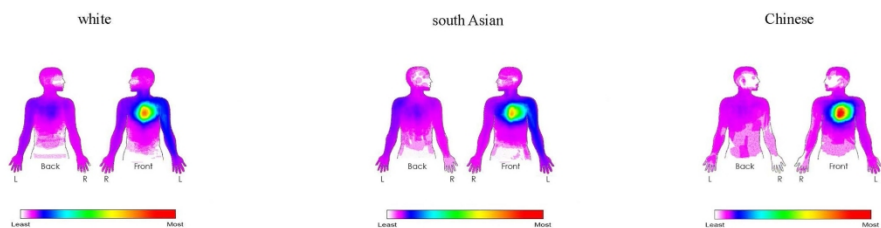

Pictographic for Each Ethnic Group

279x215mm (300 x 300 DPI)



## STROBE Statement—checklist of items that should be included in reports of observational studies

| Item No             | Recommendation                                                                                                                                                                                                                                                                                                                                                                                                                                                                                                                                                                                                                                                                                   |
|---------------------|--------------------------------------------------------------------------------------------------------------------------------------------------------------------------------------------------------------------------------------------------------------------------------------------------------------------------------------------------------------------------------------------------------------------------------------------------------------------------------------------------------------------------------------------------------------------------------------------------------------------------------------------------------------------------------------------------|
| 1                   | (a) Indicate the study's design with a commonly used term in the title or the abstract<br>(b) Provide in the abstract an informative and balanced summary of what was done and what was found                                                                                                                                                                                                                                                                                                                                                                                                                                                                                                    |
| <b>Introduction</b> |                                                                                                                                                                                                                                                                                                                                                                                                                                                                                                                                                                                                                                                                                                  |
| 2                   | Explain the scientific background and rationale for the investigation being reported                                                                                                                                                                                                                                                                                                                                                                                                                                                                                                                                                                                                             |
| 3                   | State specific objectives, including any prespecified hypotheses                                                                                                                                                                                                                                                                                                                                                                                                                                                                                                                                                                                                                                 |
| <b>Methods</b>      |                                                                                                                                                                                                                                                                                                                                                                                                                                                                                                                                                                                                                                                                                                  |
| 4                   | Present key elements of study design early in the paper                                                                                                                                                                                                                                                                                                                                                                                                                                                                                                                                                                                                                                          |
| 5                   | Describe the setting, locations, and relevant dates, including periods of recruitment, exposure, follow-up, and data collection                                                                                                                                                                                                                                                                                                                                                                                                                                                                                                                                                                  |
| 6                   | (a) <i>Cohort study</i> —Give the eligibility criteria, and the sources and methods of selection of participants. Describe methods of follow-up<br><i>Case-control study</i> —Give the eligibility criteria, and the sources and methods of case ascertainment and control selection. Give the rationale for the choice of cases and controls<br><i>Cross-sectional study</i> —Give the eligibility criteria, and the sources and methods of selection of participants<br>(b) <i>Cohort study</i> —For matched studies, give matching criteria and number of exposed and unexposed<br><i>Case-control study</i> —For matched studies, give matching criteria and the number of controls per case |
| 7                   | Clearly define all outcomes, exposures, predictors, potential confounders, and effect modifiers. Give diagnostic criteria, if applicable                                                                                                                                                                                                                                                                                                                                                                                                                                                                                                                                                         |
| 8*                  | For each variable of interest, give sources of data and details of methods of assessment (measurement). Describe comparability of assessment methods if there is more than one group                                                                                                                                                                                                                                                                                                                                                                                                                                                                                                             |
| 9                   | Describe any efforts to address potential sources of bias                                                                                                                                                                                                                                                                                                                                                                                                                                                                                                                                                                                                                                        |
| 10                  | Explain how the study size was arrived at                                                                                                                                                                                                                                                                                                                                                                                                                                                                                                                                                                                                                                                        |
| 11                  | Explain how quantitative variables were handled in the analyses. If applicable, describe which groupings were chosen and why                                                                                                                                                                                                                                                                                                                                                                                                                                                                                                                                                                     |
| 12                  | (a) Describe all statistical methods, including those used to control for confounding<br>(b) Describe any methods used to examine subgroups and interactions<br>(c) Explain how missing data were addressed<br>(d) <i>Cohort study</i> —If applicable, explain how loss to follow-up was addressed<br><i>Case-control study</i> —If applicable, explain how matching of cases and controls was addressed<br><i>Cross-sectional study</i> —If applicable, describe analytical methods taking account of sampling strategy<br>(e) Describe any sensitivity analyses                                                                                                                                |
|                     | none                                                                                                                                                                                                                                                                                                                                                                                                                                                                                                                                                                                                                                                                                             |

Continued on next page

|                          |                                                                                                                                                                                                                           |
|--------------------------|---------------------------------------------------------------------------------------------------------------------------------------------------------------------------------------------------------------------------|
| <b>Results</b>           |                                                                                                                                                                                                                           |
| Participants             | 13* (a) Report numbers of individuals at each stage of study—eg numbers potentially eligible, examined for eligibility, confirmed eligible, included in the study, completing follow-up, and analysed ✓ Pg 8              |
|                          | (b) Give reasons for non-participation at each stage ✓ Pg 8                                                                                                                                                               |
|                          | (c) Consider use of a flow diagram                                                                                                                                                                                        |
| Descriptive data         | 14* (a) Give characteristics of study participants (eg demographic, clinical, social) and information on exposures and potential confounders ✓ pp 8-10                                                                    |
|                          | (b) Indicate number of participants with missing data for each variable of interest                                                                                                                                       |
|                          | (c) <i>Cohort study</i> —Summarise follow-up time (eg, average and total amount)                                                                                                                                          |
| Outcome data             | 15* <i>Cohort study</i> —Report numbers of outcome events or summary measures over time ✓ pp 9-14                                                                                                                         |
|                          | <i>Case-control study</i> —Report numbers in each exposure category, or summary measures of exposure ✓ pp 9-14                                                                                                            |
|                          | <i>Cross-sectional study</i> —Report numbers of outcome events or summary measures ✓ pp 9-14                                                                                                                              |
| Main results             | 16 (a) Give unadjusted estimates and, if applicable, confounder-adjusted estimates and their precision (eg, 95% confidence interval). Make clear which confounders were adjusted for and why they were included ✓ pp 9-14 |
|                          | (b) Report category boundaries when continuous variables were categorized                                                                                                                                                 |
|                          | (c) If relevant, consider translating estimates of relative risk into absolute risk for a meaningful time period                                                                                                          |
| Other analyses           | 17 Report other analyses done—eg analyses of subgroups and interactions, and sensitivity analyses ✓ pp 14-16                                                                                                              |
| <b>Discussion</b>        |                                                                                                                                                                                                                           |
| Key results              | 18 Summarise key results with reference to study objectives ✓ pg 17                                                                                                                                                       |
| Limitations              | 19 Discuss limitations of the study, taking into account sources of potential bias or imprecision. Discuss both direction and magnitude of any potential bias ✓ pg 17                                                     |
| Interpretation           | 20 Give a cautious overall interpretation of results considering objectives, limitations, multiplicity of analyses, results from similar studies, and other relevant evidence ✓ pg 17                                     |
| Generalisability         | 21 Discuss the generalisability (external validity) of the study results ✓ pg 18                                                                                                                                          |
| <b>Other information</b> |                                                                                                                                                                                                                           |
| Funding                  | 22 Give the source of funding and the role of the funders for the present study and, if applicable, for the original study on which the present article is based ✓ pg 18                                                  |

\*Give information separately for cases and controls in case-control studies and, if applicable, for exposed and unexposed groups in cohort and cross-sectional studies.

**Note:** An Explanation and Elaboration article discusses each checklist item and gives methodological background and published examples of transparent reporting. The STROBE checklist is best used in conjunction with this article (freely available on the Web sites of PLoS Medicine at <http://www.plosmedicine.org/>, Annals of Internal Medicine at <http://www.annals.org/>, and Epidemiology at <http://www.epidem.com/>). Information on the STROBE Initiative is available at [www.strobe-statement.org](http://www.strobe-statement.org/).
